# Supplementary material for: Structural Analysis of Lignin-Based Furan Resin
Source: MDPI journal article supplement (doi:10.3390/ma15010350), 2022-01-04
Supplement: s1 [file s1]

Supporting Information (SI) for

## Structural Analysis of Lignin-Based Furan Resin

Xuhai Zhu<sup>1\*</sup>, Bardo Bruijnaers<sup>2</sup>, Tainise V. Lourençon<sup>1</sup>, Mikhail Balakshin<sup>1\*</sup>

<sup>1</sup>Department of Bioproducts and Biosystems, School of Chemical Engineering, Aalto University, Vuorimiehentie 1, Espoo, 02150, Finland

<sup>2</sup>Cellulose-Resin Composite Group, Nemho R&D group, Trespa International B.V., Wetering 20, Weert, 6002 SM, The Netherlands

\*Mikhail Balakshin – [mikhail.balakshin@aalto.fi](mailto:mikhail.balakshin@aalto.fi)/Mailing address: PO Box 16300, FI-00076 AALTO, Finland / Phone number: +358-(0)50-308-6570

\*Xuhai Zhu –E-mail: [zhuxh@dicp.ac.cn](mailto:zhuxh@dicp.ac.cn)/Mailing address: Dalian Institute of Chemical Physics, CAS, 457 Zhongshan Road Dalian, China 116023 / Tel.: +86-0411-8437-9846

ChemNMR <sup>1</sup>H Estimation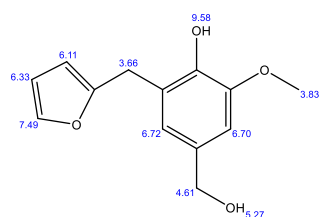

Estimation quality is indicated by color: **good**, **medium**, **rough**

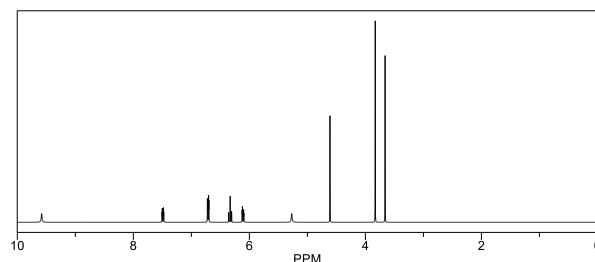

Protocol of the H-1 NMR Prediction (Lib=SU Solvent=DMSO 300 MHz):

| Node | Shift | Base + Inc. | Comment (ppm rel. to TMS) |
|------|-------|-------------|---------------------------|
| OH   | 9.58  | 4.20        | alcohol                   |
|      |       | 4.80        | 1 -C*R                    |
|      |       | 0.58        | general corrections       |
| OH   | 5.27  | 4.20        | alcohol                   |
|      |       | 1.10        | 1 -C-C*R                  |
|      |       | -0.03       | general corrections       |
| CH   | 7.49  | 7.38        | 2-furan                   |
|      |       | -0.17       | 1 -C                      |
|      |       | 0.28        | general corrections       |
| CH   | 6.11  | 6.30        | 2-furan                   |
|      |       | -0.42       | 1 -C                      |
|      |       | 0.23        | general corrections       |
| CH   | 6.33  | 6.30        | 2-furan                   |
|      |       | -0.12       | 1 -C                      |
|      |       | 0.15        | general corrections       |
| CH   | 6.70  | 7.26        | 1-benzene                 |
|      |       | -0.38       | 1 -O-C                    |
|      |       | -0.17       | 1 -O                      |
|      |       | -0.10       | 1 -CC*R                   |
|      |       | 0.00        | 1 -C-O                    |
|      |       | 0.09        | general corrections       |
| CH   | 6.72  | 7.26        | 1-benzene                 |
|      |       | -0.32       | 1 -O-C                    |
|      |       | -0.17       | 1 -O                      |
|      |       | -0.10       | 1 -CC*R                   |
|      |       | 0.00        | 1 -C-O                    |
|      |       | 0.05        | general corrections       |
| CH2  | 4.61  | 1.37        | methylene                 |
|      |       | 1.22        | 1 alpha -1:C*C*C*C*C*1    |
|      |       | 2.20        | 1 alpha -O                |
|      |       | -0.18       | general corrections       |
| CH3  | 3.83  | 0.86        | methyl                    |
|      |       | 2.87        | 1 alpha -O-1:C*C*C*C*C*1  |
|      |       | 0.10        | general corrections       |
| CH2  | 3.66  | 1.37        | methylene                 |
|      |       | 1.22        | 1 alpha -1:C*C*C*C*C*1    |
|      |       | 1.07        | 1 alpha -1:C-O-C=C=C=1    |

1H NMR Coupling Constant Prediction

| shift | atom index | coupling partner, constant and vector |
|-------|------------|---------------------------------------|
| 9.58  | 7          |                                       |
| 5.27  | 17         |                                       |
| 7.49  | 14         |                                       |
|       | 13         | 7.5 H-C*C-H                           |
|       | 12         | 1.5 H-C*CH*C-H                        |
| 6.11  | 12         |                                       |
|       | 13         | 7.5 H-C*C-H                           |
|       | 14         | 1.5 H-C*CH*C-H                        |
| 6.33  | 13         |                                       |
|       | 14         | 7.5 H-C*C-H                           |
|       | 12         | 7.5 H-C*C-H                           |
| 6.70  | 5          |                                       |
|       | 3          | 1.5 H-C*C*C-H                         |
| 6.72  | 3          |                                       |
|       | 5          | 1.5 H-C*C*C-H                         |
| 4.61  | 16         |                                       |
| 3.83  | 9          |                                       |
| 3.66  | 10         |                                       |

ChemNMR <sup>13</sup>C Estimation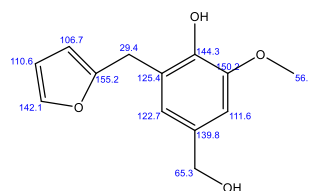

Estimation quality is indicated by color: **good**, **medium**, **rough**

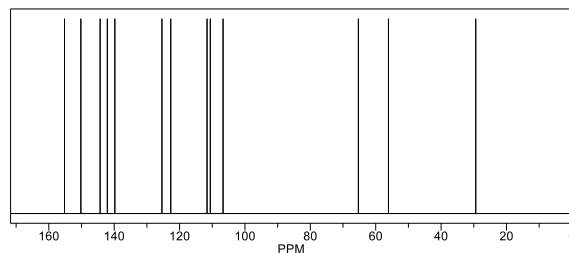

Protocol of the C-13 NMR Prediction: (Lib=S)

| Node | Shift | Base + Inc. | Comment (ppm rel. to TMS) |
|------|-------|-------------|---------------------------|
| C    | 155.2 | 143.0       | 2-furan                   |
|      |       | 9.5         | 1 -C                      |
|      |       | 2.7         | general corrections       |
| CH   | 142.1 | 143.0       | 2-furan                   |
|      |       | -1.8        | 1 -C                      |
|      |       | 0.9         | general corrections       |
| CH   | 106.7 | 109.9       | 2-furan                   |
|      |       | -4.2        | 1 -C                      |
|      |       | 1.0         | general corrections       |
| CH   | 110.6 | 109.9       | 2-furan                   |
|      |       | 0.7         | 1 -C                      |
|      |       | 0.0         | general corrections       |
| C    | 150.2 | 128.5       | 1-benzene                 |
|      |       | 33.5        | 1 -O-C                    |
|      |       | -12.8       | 1 -O                      |
|      |       | -0.1        | 1 -C                      |
|      |       | 0.2         | 1 -C-O                    |
|      |       | 0.9         | general corrections       |
| C    | 144.3 | 128.5       | 1-benzene                 |
|      |       | -14.4       | 1 -O-C                    |
|      |       | 28.8        | 1 -O                      |
|      |       | 0.7         | 1 -C                      |
|      |       | -1.1        | 1 -C-O                    |
|      |       | 1.8         | general corrections       |
| C    | 125.4 | 128.5       | 1-benzene                 |
|      |       | 1.0         | 1 -O-C                    |
|      |       | -12.8       | 1 -O                      |
|      |       | 9.2         | 1 -C                      |
|      |       | 0.2         | 1 -C-O                    |
|      |       | -0.7        | general corrections       |
| C    | 139.8 | 128.5       | 1-benzene                 |
|      |       | 1.0         | 1 -O-C                    |
|      |       | -7.4        | 1 -O                      |
|      |       | -0.1        | 1 -C                      |
|      |       | 12.4        | 1 -C-O                    |
|      |       | 5.4         | general corrections       |
| CH   | 111.6 | 128.5       | 1-benzene                 |
|      |       | -14.4       | 1 -O-C                    |
|      |       | 1.4         | 1 -O                      |
|      |       | -3.0        | 1 -C                      |
|      |       | -1.2        | 1 -C-O                    |
|      |       | 0.3         | general corrections       |
| CH   | 122.7 | 128.5       | 1-benzene                 |
|      |       | -7.7        | 1 -O-C                    |
|      |       | 1.4         | 1 -O                      |
|      |       | 0.7         | 1 -C                      |
|      |       | -1.2        | 1 -C-O                    |
|      |       | 1.0         | general corrections       |
| CH2  | 65.3  | -2.3        | aliphatic                 |
|      |       | 24.3        | 1 alpha -1:C*C*C*C*C*1    |
|      |       | 49.0        | 1 alpha -O                |
|      |       | 0.3         | 1 delta -C                |
|      |       | 0.3         | 1 delta -O                |
|      |       | -6.3        | general corrections       |
| CH3  | 56.1  | -2.3        | aliphatic                 |
|      |       | 49.0        | 1 alpha -O                |
|      |       | 9.3         | 1 beta -1:C*C*C*C*C*1     |
|      |       | 0.3         | 1 delta -O                |
|      |       | -0.2        | general corrections       |
| CH2  | 29.4  | -2.3        | aliphatic                 |
|      |       | 24.3        | 1 alpha -1:C*C*C*C*C*1    |
|      |       | 17.0        | 1 alpha -1:C-O-C=C=C=1    |
|      |       | -6.2        | 1 gamma -O                |
|      |       | 0.3         | 1 delta -C                |
|      |       | 0.3         | 1 delta -O                |
|      |       | -4.0        | general corrections       |

**Figure S1.** calculated NMR spectra of model **M1**

ChemNMR <sup>1</sup>H Estimation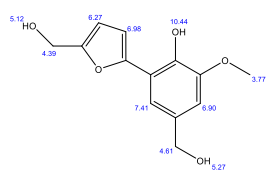

Estimation quality is indicated by color: **good**, **medium**, **rough**

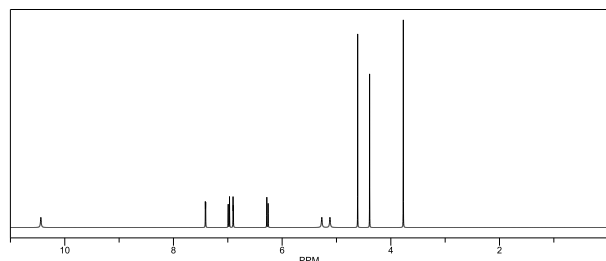

Protocol of the H-1 NMR Prediction (Lib=SU Solvent=DMSO 300 MHz):

| Node | Shift | Base + Inc.                                    | Comment (ppm rel. to TMS)                                                                       |
|------|-------|------------------------------------------------|-------------------------------------------------------------------------------------------------|
| OH   | 10.44 | 4.20<br>4.80<br>1.44                           | alcohol<br>1 -C*R<br>general corrections                                                        |
| OH   | 5.12  | 4.20<br>1.10<br>-0.18                          | alcohol<br>1 -C-C*R<br>general corrections                                                      |
| OH   | 5.27  | 4.20<br>1.10<br>-0.03                          | alcohol<br>1 -C-C*R<br>general corrections                                                      |
| CH   | 6.98  | 6.30<br>7<br>-0.05<br>0.73                     | 2-furan<br>1 unknown substituent(s)<br>1 -C-O<br>general corrections                            |
| CH   | 6.27  | 6.30<br>7<br>-0.11<br>0.08                     | 2-furan<br>1 unknown substituent(s)<br>1 -C-O<br>general corrections                            |
| CH   | 6.90  | 7.26<br>-0.38<br>-0.17<br>0.10<br>0.00         | 1-benzene<br>1 -O-C<br>1 -O<br>1 -C*R<br>1 -C-O                                                 |
| CH   | 7.41  | 0.09<br>7.26<br>-0.32<br>-0.17<br>0.34<br>0.00 | general corrections<br>1-benzene<br>1 -O-C<br>1 -O<br>1 -C*R<br>1 -C-O                          |
| CH2  | 4.39  | 0.30<br>1.37<br>1.07<br>2.20<br>-0.25          | general corrections<br>methylene<br>1 alpha -1:C-O-C=C-C=1<br>1 alpha -O<br>general corrections |
| CH2  | 4.61  | 1.37<br>1.22<br>2.20<br>-0.18                  | methylene<br>1 alpha -1:C-C-C-C-C*1<br>1 alpha -O<br>general corrections                        |
| CH3  | 3.77  | 0.86<br>2.87<br>0.04                           | methyl<br>1 alpha -O-1:C-C-C-C-C*1<br>general corrections                                       |

## 1H NMR Coupling Constant Prediction

| shift | atom index | coupling partner, constant and vector |
|-------|------------|---------------------------------------|
| 10.44 | 7          |                                       |
| 5.12  | 16         |                                       |
| 5.27  | 18         |                                       |
| 6.98  | 11         |                                       |
| 6.27  | 12         | 12 7.5 H-C*C-H                        |
| 6.90  | 5          | 11 7.5 H-C*C-H                        |
| 7.41  | 3          | 3 1.5 H-C*C-C-H                       |
| 4.39  | 15         | 5 1.5 H-C*C-C-H                       |
| 4.61  | 17         |                                       |
| 3.77  | 9          |                                       |

ChemNMR <sup>13</sup>C Estimation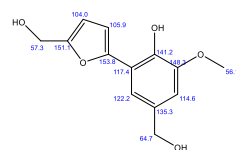

Estimation quality is indicated by color: **good**, **medium**, **rough**

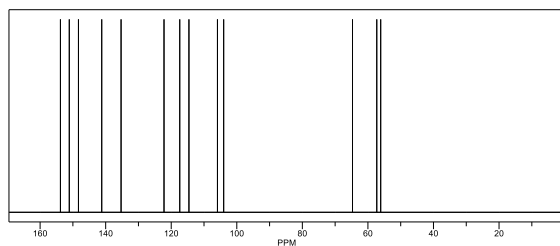

Protocol of the C-13 NMR Prediction: (Lib=S)

| Node | Shift | Base + Inc.                                   | Comment (ppm rel. to TMS)                                                                                        |
|------|-------|-----------------------------------------------|------------------------------------------------------------------------------------------------------------------|
| C    | 153.8 | 143.0<br>11.0<br>-0.2<br>0.0                  | 2-furan<br>1 -1:C-C-C-C-C*1<br>1 -C-O<br>general corrections                                                     |
| C    | 151.1 | 143.0<br>-1.0<br>11.2<br>-2.1                 | 2-furan<br>1 -1:C-C-C-C-C*1<br>1 -C-O<br>general corrections                                                     |
| CH   | 105.9 | 109.9<br>1.7<br>0.8<br>-6.5                   | 2-furan<br>1 -1:C-C-C-C-C*1<br>1 -C-O<br>general corrections                                                     |
| CH   | 104.0 | 109.9<br>-4.9<br>-2.0<br>1.0                  | 2-furan<br>1 -1:C-C-C-C-C*1<br>1 -C-O<br>general corrections                                                     |
| C    | 148.3 | 128.5<br>33.5<br>-12.8<br>0.5<br>0.2<br>-1.6  | 1-benzene<br>1 -O-C<br>1 -O<br>1 -C*R<br>1 -C-O<br>general corrections                                           |
| C    | 141.2 | 128.5<br>-14.4<br>28.8<br>-1.5<br>-1.1<br>0.9 | 1-benzene<br>1 -O-C<br>1 -O<br>1 -C*R<br>1 -C-O<br>general corrections                                           |
| C    | 117.4 | 128.5<br>-1.0<br>-12.8<br>8.0<br>0.2<br>-7.5  | 1-benzene<br>1 -O-C<br>1 -O<br>1 -C*R<br>1 -C-O<br>general corrections                                           |
| C    | 135.3 | 128.5<br>1.0<br>-7.4<br>0.5<br>12.4<br>0.3    | 1-benzene<br>1 -O-C<br>1 -O<br>1 -C*R<br>1 -C-O<br>general corrections                                           |
| CH   | 114.6 | 128.5<br>-14.4<br>1.4<br>0.0<br>-1.2<br>0.3   | 1-benzene<br>1 -O-C<br>1 -O<br>1 -C*R<br>1 -C-O<br>general corrections                                           |
| CH   | 122.2 | 128.5<br>-7.7<br>1.4<br>-1.5<br>-1.2<br>2.7   | 1-benzene<br>1 -O-C<br>1 -O<br>1 -C*R<br>1 -C-O<br>general corrections                                           |
| CH2  | 57.3  | -2.3<br>17.0<br>49.0<br>0.3<br>-6.7           | aliphatic<br>1 alpha -1:C-O-C-C-C=1<br>1 alpha -O<br>1 delta -1:C-C-C-C-C*1<br>general corrections               |
| CH2  | 64.7  | -2.3<br>24.3<br>49.0<br>-0.3<br>0.3<br>-6.3   | aliphatic<br>1 alpha -1:C-C-C-C-C*1<br>1 alpha -O<br>1 delta -1:C-O-C-C-C=1<br>1 delta -O<br>general corrections |
| CH3  | 56.1  | -2.3<br>49.0<br>9.3<br>0.3<br>-0.2            | aliphatic<br>1 alpha -O<br>1 beta -1:C-C-C-C-C*1<br>1 delta -O<br>general corrections                            |

**Figure S2.** calculated NMR spectra of model M2

ChemNMR <sup>1</sup>H Estimation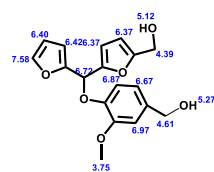

Estimation quality is indicated by color: good, medium, rough

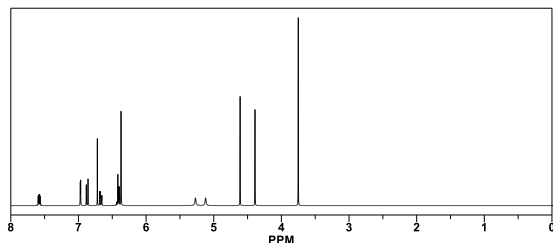

Protocol of the H-1 NMR Prediction (Lib=SU Solvent=DMSO 300 MHz):

| Node | Shift | Base + Inc. | Comment (ppm rel. to TMS) |
|------|-------|-------------|---------------------------|
| OH   | 5.12  | 4.20        | alcohol                   |
|      |       | 1.10        | 1 -C-C*R                  |
|      |       | -0.18       | general corrections       |
| OH   | 5.27  | 4.20        | alcohol                   |
|      |       | 1.10        | 1 -C-C*R                  |
|      |       | -0.03       | general corrections       |
| CH   | 7.58  | 7.38        | 2-furan                   |
|      |       | -0.08       | 1 -C-O                    |
|      |       | 0.28        | general corrections       |
| CH   | 6.37  | 6.30        | 2-furan                   |
|      |       | -0.11       | 1 -C-O                    |
|      |       | -0.05       | 1 -C-O                    |
|      |       | 0.23        | general corrections       |
| CH   | 6.42  | 6.30        | 2-furan                   |
|      |       | -0.11       | 1 -C-O                    |
|      |       | 0.23        | general corrections       |
| CH   | 6.37  | 6.30        | 2-furan                   |
|      |       | -0.05       | 1 -C-O                    |
|      |       | -0.11       | 1 -C-O                    |
|      |       | 0.23        | general corrections       |
| CH   | 6.40  | 6.30        | 2-furan                   |
|      |       | -0.05       | 1 -C-O                    |
|      |       | 0.15        | general corrections       |
| CH   | 6.97  | 7.26        | 1-benzene                 |
|      |       | 0.00        | 1 -O-C                    |
|      |       | -0.38       | 1 -O-C                    |
|      |       | 0.00        | 1 -O-C                    |
|      |       | 0.03        | 1 -C-O                    |
|      |       | -0.04       | general corrections       |
| CH   | 6.67  | 7.26        | 1-benzene                 |
|      |       | 0.00        | 1 -O-C                    |
|      |       | -0.32       | 1 -O-C                    |
|      |       | 0.00        | 1 -C-O                    |
|      |       | -0.27       | general corrections       |
| CH   | 6.72  | 1.50        | methine                   |
|      |       | 3.02        | 2 alpha -1:C*O*C*C*C*1    |
|      |       | 2.20        | 1 alpha -O-1:C*C*C*C*C*1  |
| CH2  | 4.39  | 1.37        | methylene                 |
|      |       | 1.07        | 1 alpha -1:C-O-C=C-C=1    |
|      |       | 2.20        | 1 alpha -O                |
|      |       | -0.25       | general corrections       |
| CH2  | 4.61  | 1.37        | methylene                 |
|      |       | 1.22        | 1 alpha -1:C*C*C*C*C*1    |
|      |       | 2.20        | 1 alpha -O                |
|      |       | -0.18       | general corrections       |
| CH3  | 3.75  | 0.86        | methyl                    |
|      |       | 2.87        | 1 alpha -O-1:C*C*C*C*C*1  |
|      |       | 0.02        | general corrections       |

## 1H NMR Coupling Constant Prediction

| shift | atom index | coupling partner, constant and vector |
|-------|------------|---------------------------------------|
| 5.12  | 13         |                                       |
| 5.27  | 24         |                                       |
| 7.58  | 3          |                                       |
|       |            | 2 7.5 H-C*C-H                         |
|       |            | 1 1.5 H-C*CH*C-H                      |
| 6.37  | 11         |                                       |
|       |            | 10 7.5 H-C*C-H                        |
| 6.42  | 1          |                                       |
|       |            | 2 7.5 H-C*C-H                         |
|       |            | 3 1.5 H-C*CH*C-H                      |
| 6.37  | 10         |                                       |
|       |            | 11 7.5 H-C*C-H                        |
| 6.40  | 2          |                                       |
|       |            | 3 7.5 H-C*C-H                         |
|       |            | 1 7.5 H-C*C-H                         |
| 6.97  | 17         |                                       |
|       |            | 19 1.5 H-C*C*C-H                      |
| 6.87  | 20         |                                       |
|       |            | 19 7.5 H-C*C-H                        |
| 6.67  | 19         |                                       |
|       |            | 20 7.5 H-C*C-H                        |
|       |            | 17 1.5 H-C*C*C-H                      |
| 6.72  | 6          |                                       |
| 4.39  | 12         |                                       |
| 4.61  | 23         |                                       |
| 3.75  | 22         |                                       |

ChemNMR <sup>13</sup>C Estimation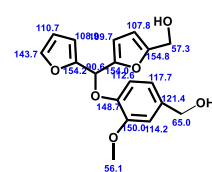

Estimation quality is indicated by color: good, medium, rough

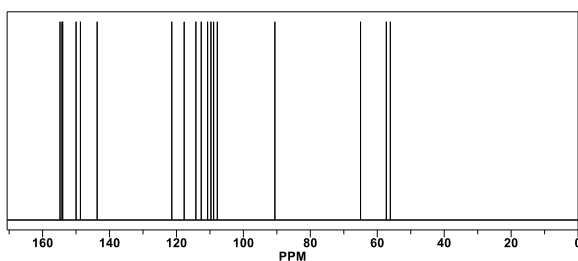

Protocol of the C-13 NMR Prediction: (Lib=S)

| Node | Shift | Base + Inc. | Comment (ppm rel. to TMS) |
|------|-------|-------------|---------------------------|
| C    | 154.0 | 143.0       | 2-furan                   |
|      |       | 11.2        | 1 -C-O                    |
|      |       | -0.2        | 1 -C-O                    |
| C    | 154.2 | 143.0       | 2-furan                   |
|      |       | 11.2        | 1 -C-O                    |
| C    | 154.8 | 143.0       | 2-furan                   |
|      |       | -0.2        | 1 -C-O                    |
|      |       | 11.2        | 1 -C-O                    |
|      |       | 0.8         | general corrections       |
| CH   | 143.7 | 143.0       | 2-furan                   |
|      |       | -0.2        | 1 -C-O                    |
|      |       | 0.9         | general corrections       |
| CH   | 109.7 | 109.9       | 2-furan                   |
|      |       | -2.0        | 1 -C-O                    |
|      |       | 0.8         | 1 -C-O                    |
|      |       | 1.0         | general corrections       |
| CH   | 108.9 | 109.9       | 2-furan                   |
|      |       | -2.0        | 1 -C-O                    |
|      |       | 1.0         | general corrections       |
| CH   | 107.8 | 109.9       | 2-furan                   |
|      |       | 0.8         | 1 -C-O                    |
|      |       | -2.0        | 1 -C-O                    |
|      |       | -0.9        | general corrections       |
| CH   | 110.7 | 109.9       | 2-furan                   |
|      |       | 0.8         | 1 -C-O                    |
|      |       | 0.0         | general corrections       |
| C    | 148.7 | 128.5       | 1-benzene                 |
|      |       | 33.5        | 1 -O-C                    |
|      |       | -14.4       | 1 -O-C                    |
|      |       | -1.1        | 1 -C-O                    |
|      |       | 2.2         | general corrections       |
| C    | 150.0 | 128.5       | 1-benzene                 |
|      |       | -14.4       | 1 -O-C                    |
|      |       | 33.5        | 1 -O-C                    |
|      |       | 0.2         | 1 -C-O                    |
|      |       | 2.2         | general corrections       |
| C    | 121.4 | 128.5       | 1-benzene                 |
|      |       | -7.7        | 1 -O-C                    |
|      |       | 1.0         | 1 -O-C                    |
|      |       | 12.4        | 1 -C-O                    |
|      |       | -12.8       | general corrections       |
| CH   | 114.2 | 128.5       | 1-benzene                 |
|      |       | 1.0         | 1 -O-C                    |
|      |       | -14.4       | 1 -O-C                    |
|      |       | -1.2        | 1 -C-O                    |
|      |       | 0.3         | general corrections       |
| CH   | 112.6 | 128.5       | 1-benzene                 |
|      |       | -14.4       | 1 -O-C                    |
|      |       | 1.0         | 1 -O-C                    |
|      |       | 0.2         | 1 -C-O                    |
|      |       | 2.7         | general corrections       |
| CH   | 117.7 | 128.5       | 1-benzene                 |
|      |       | 1.0         | 1 -O-C                    |
|      |       | -7.7        | 1 -O-C                    |
|      |       | -1.2        | 1 -C-O                    |
|      |       | -2.9        | general corrections       |
| CH   | 90.6  | -2.3        | aliphatic                 |
|      |       | 34.0        | 2 alpha -1:C-O-C=C-C=1    |
|      |       | 49.0        | 1 alpha -O                |
|      |       | 9.3         | 1 beta -1:C*C*C*C*C*1     |
|      |       | 0.3         | 1 delta -C                |
|      |       | 0.3         | 1 delta -O                |
| CH2  | 57.3  | -2.3        | aliphatic                 |
|      |       | 17.0        | 1 alpha -1:C-O-C=C-C=1    |
|      |       | 49.0        | 1 alpha -O                |
|      |       | 0.3         | 1 delta -C                |
|      |       | -6.7        | general corrections       |
| CH2  | 65.0  | -2.3        | aliphatic                 |
|      |       | 24.3        | 1 alpha -1:C*C*C*C*C*1    |
|      |       | 49.0        | 1 alpha -O                |
|      |       | 0.3         | 1 delta -O                |
|      |       | -6.3        | general corrections       |
| CH3  | 56.1  | -2.3        | aliphatic                 |
|      |       | 49.0        | 1 alpha -O                |
|      |       | 9.3         | 1 beta -1:C*C*C*C*C*1     |
|      |       | 0.3         | 1 delta -O                |
|      |       | -0.2        | general corrections       |

Figure S3. calculated NMR spectra of model M3



ChemNMR <sup>1</sup>H Estimation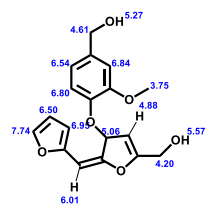

Estimation quality is indicated by color: **good**, **medium**, **rough**

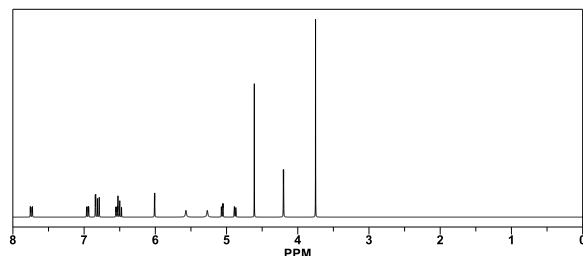

Protocol of the <sup>1</sup>H-1 NMR Prediction (Lib=SU Solvent=DMSO 300 MHz):

| Node | Shift | Base + Inc. | Comment (ppm rel. to TMS)  |
|------|-------|-------------|----------------------------|
| OH   | 5.57  | 4.20        | alcohol                    |
|      |       | 0.75        | 1 -CC=C                    |
|      |       | 0.62        | general corrections        |
| OH   | 5.27  | 4.20        | alcohol                    |
|      |       | 1.10        | 1 -C-C*R                   |
|      |       | -0.03       | general corrections        |
| CH   | 7.74  | 7.38        | 2-furan                    |
|      |       | ?           | 1 unknown substituent(s)   |
|      |       | 0.36        | general corrections        |
| CH   | 5.06  | 1.50        | methine                    |
|      |       | 1.36        | 2 alpha -C=C               |
|      |       | 2.20        | 1 alpha -O-1:C*C*C*C*C*C*1 |
| CH   | 6.95  | 6.30        | 2-furan                    |
|      |       | ?           | 1 unknown substituent(s)   |
|      |       | 0.65        | general corrections        |
| CH   | 6.50  | 6.30        | 2-furan                    |
|      |       | ?           | 1 unknown substituent(s)   |
|      |       | 0.20        | general corrections        |
| CH   | 6.84  | 7.26        | 1-benzene                  |
|      |       | -0.13       | 1 -O-CC=C                  |
|      |       | -0.38       | 1 -O-C                     |
|      |       | 0.00        | 1 -C-O                     |
|      |       | 0.09        | general corrections        |
| CH   | 6.80  | 7.26        | 1-benzene                  |
|      |       | -0.45       | 1 -O-CC=C                  |
|      |       | 0.00        | 1 -O-C                     |
|      |       | 0.03        | 1 -C-O                     |
|      |       | -0.04       | general corrections        |
| CH   | 6.54  | 7.26        | 1-benzene                  |
|      |       | -0.13       | 1 -O-CC=C                  |
|      |       | -0.32       | 1 -O-C                     |
|      |       | 0.00        | 1 -C-O                     |
|      |       | -0.27       | general corrections        |
| CH2  | 4.20  | 1.37        | methylene                  |
|      |       | 0.63        | 1 alpha -C=C               |
|      |       | 2.20        | 1 alpha -O                 |
| CH2  | 4.61  | 1.37        | methylene                  |
|      |       | 1.22        | 1 alpha -1:C*C*C*C*C*C*1   |
|      |       | 2.20        | 1 alpha -O                 |
|      |       | -0.18       | general corrections        |
| CH3  | 3.75  | 0.86        | methyl                     |
|      |       | 2.87        | 1 alpha -O-1:C*C*C*C*C*C*1 |
|      |       | 0.02        | general corrections        |
| H    | 4.88  | 5.25        | 1-ethylene                 |
|      |       | -1.00       | 1 -O-C=C trans             |
|      |       | -0.01       | 1 -C-O cis                 |
|      |       | 0.64        | 1 -C-O gem                 |
| H    | 6.01  | 5.25        | 1-ethylene                 |
|      |       | -0.60       | 1 -O-C=C cis               |
|      |       | -0.02       | 1 -C-O trans               |
|      |       | 1.38        | 1 -C*R gem                 |

## 1H NMR Coupling Constant Prediction

| shift | atom index | coupling partner, constant and vector |
|-------|------------|---------------------------------------|
| 5.57  | 13         |                                       |
| 5.27  | 24         |                                       |
| 7.74  | 3          |                                       |
|       | 2          | 7.5 H-C*C-H                           |
|       | 1          | 1.5 H-C*CH*C-H                        |
| 5.06  | 11         |                                       |
|       | 25         | 6.2 H-C-C(sp2)-H                      |
|       | 26         | -1.0 H-C>C=C*H                        |
| 6.95  | 1          |                                       |
|       | 2          | 7.5 H-C*C-H                           |
|       | 3          | 1.5 H-C*CH*C-H                        |
| 6.50  | 2          |                                       |
|       | 3          | 7.5 H-C*C-H                           |
|       | 1          | 7.5 H-C*C-H                           |
| 6.84  | 17         |                                       |
|       | 19         | 1.5 H-C*C*C-H                         |
| 6.80  | 20         |                                       |
|       | 19         | 7.5 H-C*C-H                           |
| 6.54  | 19         |                                       |
|       | 20         | 7.5 H-C*C-H                           |
|       | 17         | 1.5 H-C*C*C-H                         |
| 4.20  | 12         |                                       |
|       | 25         | -1.0 H-CH>C=C<H                       |
| 4.61  | 23         |                                       |
| 3.75  | 22         |                                       |
| 4.88  | 25         |                                       |
|       | 11         | 6.2 H-C(sp2)-C-H                      |
|       | 12         | -1.0 H>C=C<CH-H                       |
| 6.01  | 26         |                                       |
|       | 11         | -1.0 H>C=C<C-H                        |

ChemNMR <sup>13</sup>C Estimation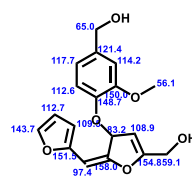

Estimation quality is indicated by color: **good**, **medium**, **rough**

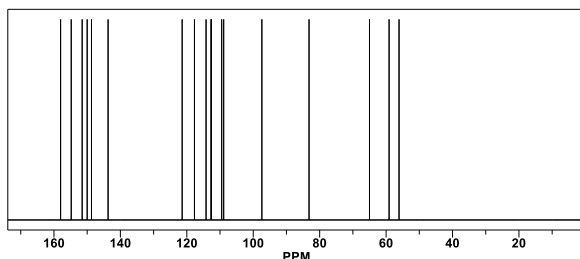

Protocol of the <sup>13</sup>C-13 NMR Prediction: (Lib=S)

| Node | Shift | Base + Inc. | Comment (ppm rel. to TMS) |
|------|-------|-------------|---------------------------|
| C    | 154.8 | 123.3       | 1-ethylene                |
|      |       | 14.2        | 1 -C-O                    |
|      |       | 25.5        | 1 -OC=C                   |
|      |       | -8.2        | 1 -C-O                    |
| C    | 151.5 | 143.0       | 2-furan                   |
|      |       | 12.3        | 1 -C=C                    |
|      |       | -2.8        | general corrections       |
| CH   | 143.7 | 143.0       | 2-furan                   |
|      |       | 2.0         | 1 -C=C                    |
|      |       | -1.3        | general corrections       |
| C    | 158.0 | 123.3       | 1-ethylene                |
|      |       | 14.2        | 1 -C-O                    |
|      |       | 25.5        | 1 -OC=C                   |
|      |       | -5.0        | 1 -C*R                    |
| CH   | 83.2  | -2.3        | aliphatic                 |
|      |       | 39.0        | 2 alpha -C=C              |
|      |       | 49.0        | 1 alpha -O                |
|      |       | 9.3         | 1 beta -1:C*C*C*C*C*C*1   |
|      |       | 10.1        | 1 beta -O                 |
|      |       | -5.0        | 1 gamma -1:C-O-C=C-C=1    |
|      |       | -2.5        | 1 gamma -C                |
|      |       | 0.6         | 2 delta -O                |
|      |       | -15.0       | general corrections       |
| CH   | 108.9 | 123.3       | 1-ethylene                |
|      |       | -8.2        | 1 -C-O                    |
|      |       | -30.2       | 1 -OC=C                   |
|      |       | 14.2        | 1 -C-O                    |
|      |       | 9.8         | general corrections       |
| CH   | 109.5 | 109.9       | 2-furan                   |
|      |       | 1.9         | 1 -C=C                    |
|      |       | -2.3        | general corrections       |
| CH   | 112.7 | 109.9       | 2-furan                   |
|      |       | 2.8         | 1 -C=C                    |
|      |       | 0.0         | general corrections       |
| C    | 148.7 | 128.5       | 1-benzene                 |
|      |       | 33.5        | 1 -O-C                    |
|      |       | -14.4       | 1 -O-C                    |
|      |       | -1.1        | 1 -C-O                    |
|      |       | 2.2         | general corrections       |
| C    | 150.0 | 128.5       | 1-benzene                 |
|      |       | -14.4       | 1 -O-C                    |
|      |       | 33.5        | 1 -O-C                    |
|      |       | 0.2         | 1 -C-O                    |
|      |       | 2.2         | general corrections       |
| C    | 121.4 | 128.5       | 1-benzene                 |
|      |       | -7.7        | 1 -O-C                    |
|      |       | 1.0         | 1 -O-C                    |
|      |       | 12.4        | 1 -C-O                    |
|      |       | -12.8       | general corrections       |
| CH   | 114.2 | 128.5       | 1-benzene                 |
|      |       | 1.0         | 1 -O-C                    |
|      |       | -14.4       | 1 -O-C                    |
|      |       | -1.2        | 1 -C-O                    |
|      |       | 0.3         | general corrections       |
| CH   | 112.6 | 128.5       | 1-benzene                 |
|      |       | -14.4       | 1 -O-C                    |
|      |       | 1.0         | 1 -O-C                    |
|      |       | 0.2         | 1 -C-O                    |
|      |       | -2.7        | general corrections       |
| CH   | 117.7 | 128.5       | 1-benzene                 |
|      |       | 1.0         | 1 -O-C                    |
|      |       | -7.7        | 1 -O-C                    |
|      |       | -1.2        | 1 -C-O                    |
|      |       | -2.9        | general corrections       |
| CH2  | 59.1  | -2.3        | aliphatic                 |
|      |       | 19.5        | 1 alpha -C=C              |
|      |       | 49.0        | 1 alpha -O                |
|      |       | 10.1        | 1 beta -O                 |
|      |       | -2.1        | 1 gamma -C=C              |
|      |       | -2.5        | 1 gamma -C                |
|      |       | 0.3         | 1 delta -O                |
|      |       | -12.9       | general corrections       |
| CH2  | 65.0  | -2.3        | aliphatic                 |
|      |       | 24.3        | 1 alpha -1:C*C*C*C*C*C*1  |
|      |       | 49.0        | 1 alpha -O                |
|      |       | 0.3         | 1 delta -O                |
|      |       | -6.3        | general corrections       |
| CH3  | 56.1  | -2.3        | aliphatic                 |
|      |       | 49.0        | 1 alpha -O                |
|      |       | 9.3         | 1 beta -1:C*C*C*C*C*C*1   |
|      |       | 0.3         | 1 delta -O                |
|      |       | -0.2        | general corrections       |
| CH   | 97.4  | 123.3       | 1-ethylene                |
|      |       | -8.2        | 1 -C-O                    |
|      |       | -30.2       | 1 -OC=C                   |
|      |       | 12.5        | 1 -C*R                    |

**Figure S4.** calculated NMR spectra of model M4

ChemNMR <sup>1</sup>H Estimation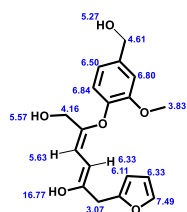

Estimation quality is indicated by color: **good**, **medium**, **rough**

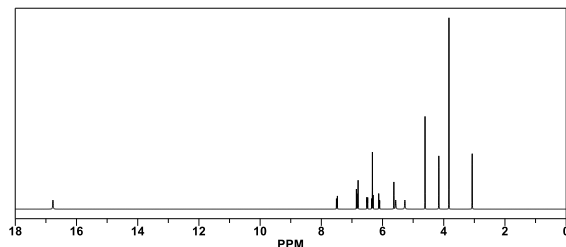

Protocol of the H-1 NMR Prediction (Lib=SU Solvent=DMSO 300 MHz):

| Node | Shift | Base + Inc. | Comment (ppm rel. to TMS) |
|------|-------|-------------|---------------------------|
| OH   | 5.27  | 4.20        | alcohol                   |
|      |       | 1.10        | 1 -C-C*R                  |
|      |       | -0.03       | general corrections       |
| OH   | 16.77 | 15.00       | enol                      |
|      |       | 1.77        | general corrections       |
| OH   | 5.57  | 4.20        | alcohol                   |
|      |       | 0.75        | 1 -C=C                    |
|      |       | 0.62        | general corrections       |
| CH   | 7.49  | 7.38        | 2-furan                   |
|      |       | -0.17       | 1 -C                      |
|      |       | 0.28        | general corrections       |
| CH   | 6.11  | 6.30        | 2-furan                   |
|      |       | -0.42       | 1 -C                      |
|      |       | 0.23        | general corrections       |
| CH   | 6.33  | 6.30        | 2-furan                   |
|      |       | -0.12       | 1 -C                      |
|      |       | 0.15        | general corrections       |
| CH   | 6.80  | 7.26        | 1-benzene                 |
|      |       | -0.17       | 1 -O                      |
|      |       | -0.38       | 1 -O-C                    |
|      |       | 0.00        | 1 -C-O                    |
|      |       | 0.09        | general corrections       |
| CH   | 6.84  | 7.26        | 1-benzene                 |
|      |       | -0.53       | 1 -O                      |
|      |       | 0.00        | 1 -O-C                    |
|      |       | 0.03        | 1 -C-O                    |
|      |       | 0.08        | general corrections       |
| CH   | 6.50  | 7.26        | 1-benzene                 |
|      |       | -0.17       | 1 -O                      |
|      |       | -0.32       | 1 -O-C                    |
|      |       | 0.00        | 1 -C-O                    |
|      |       | -0.27       | general corrections       |
| CH2  | 4.61  | 1.37        | methylene                 |
|      |       | 1.22        | 1 alpha -1:C*C*C*C*C*1    |
|      |       | 2.20        | 1 alpha -O                |
|      |       | -0.18       | general corrections       |
| CH2  | 4.16  | 1.37        | methylene                 |
|      |       | 0.63        | 1 alpha -C=C              |
|      |       | 2.20        | 1 alpha -O                |
|      |       | -0.04       | general corrections       |
| CH3  | 3.83  | 0.86        | methyl                    |
|      |       | 2.87        | 1 alpha -O-1:C*C*C*C*C*1  |
|      |       | 0.10        | general corrections       |
| CH2  | 3.07  | 1.37        | methylene                 |
|      |       | 1.07        | 1 alpha -1:C-O-C=C=1      |
|      |       | 0.63        | 1 alpha -C=C              |
| H    | 5.63  | 5.25        | 1-ethylene                |
|      |       | -0.85       | 1 -O-1:C*C*C*C*C*1 trans  |
|      |       | -0.01       | 1 -C-O cis                |
|      |       | 1.24        | 1 -C=C gem                |
| H    | 6.33  | 5.25        | 1-ethylene                |
|      |       | -0.22       | 1 -C cis                  |
|      |       | ?           | 1 unknown substituent(s)  |
|      |       | 1.24        | 1 -C=C gem                |
|      |       | 0.06        | general corrections       |

## 1H NMR Coupling Constant Prediction

| shift | atom index | coupling partner, constant and vector |
|-------|------------|---------------------------------------|
| 5.27  | 24         |                                       |
| 16.77 | 12         |                                       |
| 5.57  | 22         |                                       |
| 7.49  | 3          |                                       |
|       |            | 2 7.5 H-C*C-H                         |
|       |            | 1 1.5 H-C*CH*C-H                      |
| 6.11  | 1          |                                       |
|       |            | 2 7.5 H-C*C-H                         |
|       |            | 3 1.5 H-C*CH*C-H                      |
| 6.33  | 2          |                                       |
|       |            | 3 7.5 H-C*C-H                         |
|       |            | 1 7.5 H-C*C-H                         |
| 6.80  | 15         |                                       |
|       |            | 17 1.5 H-C*C*C-H                      |
| 6.84  | 18         |                                       |
|       |            | 17 7.5 H-C*C-H                        |
| 6.50  | 17         |                                       |
|       |            | 18 7.5 H-C*C-H                        |
|       |            | 15 1.5 H-C*C*C-H                      |
| 4.61  | 23         |                                       |
| 4.16  | 21         |                                       |
|       |            | 25 -1.0 H-CH>C=C<H                    |
| 3.83  | 20         |                                       |
| 3.07  | 6          |                                       |
|       |            | 26 -1.0 H-CH>C=C<H                    |
| 5.63  | 25         |                                       |
|       |            | 21 -1.0 H>C=C<CH-H                    |
| 6.33  | 26         |                                       |
|       |            | 6 -1.0 H>C=C<CH-H                     |

ChemNMR <sup>13</sup>C Estimation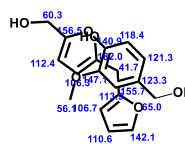

Estimation quality is indicated by color: **good**, **medium**, **rough**

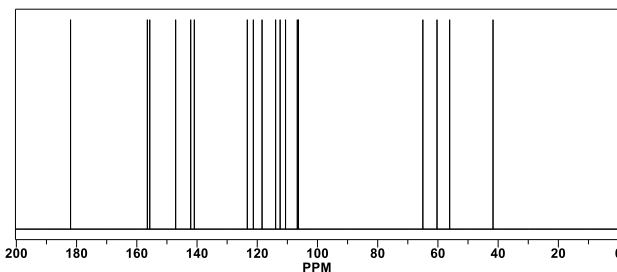

Protocol of the C-13 NMR Prediction: (Lib=S)

| Node | Shift | Base + Inc. | Comment (ppm rel. to TMS) |
|------|-------|-------------|---------------------------|
| C    | 155.7 | 143.0       | 2-furan                   |
|      |       | 9.5         | 1 -C                      |
|      |       | 3.2         | general corrections       |
| CH   | 142.1 | 143.0       | 2-furan                   |
|      |       | -1.8        | 1 -C                      |
|      |       | 0.9         | general corrections       |
| CH   | 106.7 | 109.9       | 2-furan                   |
|      |       | -4.2        | 1 -C                      |
|      |       | 1.0         | general corrections       |
| CH   | 110.6 | 109.9       | 2-furan                   |
|      |       | 0.7         | 1 -C                      |
|      |       | 0.0         | general corrections       |
| C    | 140.9 | 128.5       | 1-benzene                 |
|      |       | 28.2        | 1 -O-C=C                  |
|      |       | -14.4       | 1 -O-C                    |
|      |       | -1.1        | 1 -C-O                    |
|      |       | -0.3        | general corrections       |
| C    | 147.1 | 128.5       | 1-benzene                 |
|      |       | -11.5       | 1 -O-C=C                  |
|      |       | 33.5        | 1 -O-C                    |
|      |       | 0.2         | 1 -C-O                    |
|      |       | -3.6        | general corrections       |
| C    | 123.3 | 128.5       | 1-benzene                 |
|      |       | -5.8        | 1 -O-C=C                  |
|      |       | 1.0         | 1 -O-C                    |
|      |       | 12.4        | 1 -C-O                    |
|      |       | -12.8       | general corrections       |
| CH   | 113.9 | 128.5       | 1-benzene                 |
|      |       | 0.7         | 1 -O-C=C                  |
|      |       | -14.4       | 1 -O-C                    |
|      |       | -1.2        | 1 -C-O                    |
|      |       | 0.3         | general corrections       |
| CH   | 118.4 | 128.5       | 1-benzene                 |
|      |       | -11.5       | 1 -O-C=C                  |
|      |       | 1.0         | 1 -O-C                    |
|      |       | 0.2         | 1 -C-O                    |
|      |       | 0.2         | general corrections       |
| CH   | 121.3 | 128.5       | 1-benzene                 |
|      |       | 0.7         | 1 -O-C=C                  |
|      |       | -7.7        | 1 -O-C                    |
|      |       | -1.2        | 1 -C-O                    |
|      |       | 1.0         | general corrections       |
| CH2  | 65.0  | -2.3        | aliphatic                 |
|      |       | 24.3        | 1 alpha -1:C*C*C*C*C*1    |
|      |       | 49.0        | 1 alpha -O                |
|      |       | 0.3         | 1 delta -O                |
|      |       | -6.3        | general corrections       |
| C    | 156.5 | 123.3       | 1-ethylene                |
|      |       | 14.2        | 1 -C-O                    |
|      |       | 26.0        | 1 -O-1:C*C*C*C*C*1        |
|      |       | -7.0        | 1 -C=C                    |
| C    | 182.0 | 123.3       | 1-ethylene                |
|      |       | 9.4         | 1 -C                      |
|      |       | 52.7        | 1 -O                      |
|      |       | -7.0        | 1 -C=C                    |
|      |       | 3.6         | general corrections       |
| CH2  | 60.3  | -2.3        | aliphatic                 |
|      |       | 19.5        | 1 alpha -C=C              |
|      |       | 49.0        | 1 alpha -O                |
|      |       | 10.1        | 1 beta -O                 |
|      |       | -2.6        | 1 gamma -1:C*C*C*C*C*1    |
|      |       | -2.1        | 1 gamma -C=C              |
|      |       | -11.3       | general corrections       |
| CH3  | 56.1  | -2.3        | aliphatic                 |
|      |       | 49.0        | 1 alpha -O                |
|      |       | 9.3         | 1 beta -1:C*C*C*C*C*1     |
|      |       | 0.3         | 1 delta -O                |
|      |       | -0.2        | general corrections       |
| CH2  | 41.7  | -2.3        | aliphatic                 |
|      |       | 17.0        | 1 alpha -1:C-O-C=C=1      |
|      |       | 19.5        | 1 alpha -C=C              |
|      |       | 10.1        | 1 beta -O                 |
|      |       | -2.1        | 1 gamma -C=C              |
|      |       | -0.5        | general corrections       |
| CH   | 112.4 | 123.3       | 1-ethylene                |
|      |       | -8.2        | 1 -C-O                    |
|      |       | -28.4       | 1 -O-1:C*C*C*C*C*1        |
|      |       | 13.6        | 1 -C=C                    |
|      |       | 12.1        | general corrections       |
| CH   | 106.3 | 123.3       | 1-ethylene                |
|      |       | -7.4        | 1 -C                      |
|      |       | -35.3       | 1 -O                      |
|      |       | 13.6        | 1 -C=C                    |
|      |       | 12.1        | general corrections       |

Figure S5. calculated NMR spectra of model M5

ChemNMR <sup>1</sup>H Estimation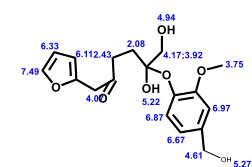

Estimation quality is indicated by color: **good**, **medium**, **rough**

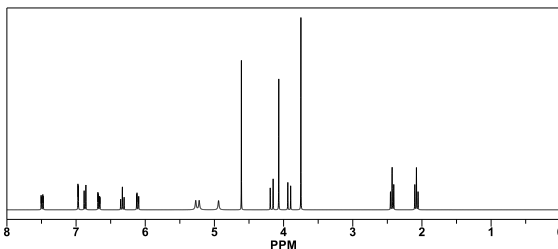

Protocol of the H-1 NMR Prediction (Lib=SU Solvent=DMSO 300 MHz):

| Node | Shift         | Base + Inc. | Comment (ppm rel. to TMS)  |
|------|---------------|-------------|----------------------------|
| OH   | 5.22          | 4.20        | alcohol                    |
|      |               | 1.20        | 1 -CCO                     |
|      |               | -0.18       | general corrections        |
| OH   | 5.27          | 4.20        | alcohol                    |
|      |               | 1.10        | 1 -C-C*R                   |
|      |               | -0.03       | general corrections        |
| OH   | 4.94          | 4.20        | alcohol                    |
|      |               | 1.20        | 1 -CCO                     |
|      |               | -0.46       | general corrections        |
| CH   | 7.49          | 7.38        | 2-furan                    |
|      |               | -0.17       | 1 -C                       |
|      |               | 0.28        | general corrections        |
| CH   | 6.11          | 6.30        | 2-furan                    |
|      |               | -0.42       | 1 -C                       |
|      |               | 0.23        | general corrections        |
| CH   | 6.33          | 6.30        | 2-furan                    |
|      |               | -0.12       | 1 -C                       |
|      |               | 0.15        | general corrections        |
| CH   | 6.97          | 7.26        | 1-benzene                  |
|      |               | 0.00        | 1 -O-C                     |
|      |               | -0.38       | 1 -O-C                     |
|      |               | 0.00        | 1 -C-O                     |
|      |               | 0.09        | general corrections        |
| CH   | 6.87          | 7.26        | 1-benzene                  |
|      |               | -0.38       | 1 -O-C                     |
|      |               | 0.00        | 1 -O-C                     |
|      |               | 0.03        | 1 -C-O                     |
|      |               | -0.04       | general corrections        |
| CH   | 6.67          | 7.26        | 1-benzene                  |
|      |               | 0.00        | 1 -O-C                     |
|      |               | -0.32       | 1 -O-C                     |
|      |               | 0.00        | 1 -C-O                     |
|      |               | -0.27       | general corrections        |
| CH2  | 4.61          | 1.37        | methylene                  |
|      |               | 1.22        | 1 alpha -1:C*C*C*C*C*C*1   |
|      |               | 2.20        | 1 alpha -O                 |
|      |               | -0.18       | general corrections        |
| CH2  | 4.17,3.915000 | 1.37        | methylene                  |
|      |               | 2.20        | 1 alpha -O                 |
|      |               | 0.38        | 1 beta -O-1:C*C*C*C*C*C*1  |
|      |               | 0.15        | 1 beta -O                  |
|      |               | -0.06       | 1 beta -C                  |
| CH3  | 3.75          | 0.86        | methyl                     |
|      |               | 2.87        | 1 alpha -O-1:C*C*C*C*C*C*1 |
|      |               | 0.02        | general corrections        |
| CH2  | 4.07          | 1.37        | methylene                  |
|      |               | 1.07        | 1 alpha -1:C-O-C=C-C=1     |
|      |               | 1.12        | 1 alpha -C(=O)-C           |
|      |               | 0.51        | general corrections        |
| CH2  | 2.43          | 1.37        | methylene                  |
|      |               | 1.12        | 1 alpha -C(=O)-C           |
|      |               | -0.06       | 1 beta -C                  |
| CH2  | 2.08          | 1.37        | methylene                  |
|      |               | 0.38        | 1 beta -O-1:C*C*C*C*C*C*1  |
|      |               | 0.15        | 1 beta -O                  |
|      |               | -0.06       | 1 beta -C                  |
|      |               | 0.24        | 1 beta -C(=O)-C            |

## 1H NMR Coupling Constant Prediction

| shift | atom index | coupling partner           | constant and vector |
|-------|------------|----------------------------|---------------------|
| 5.22  | 8          |                            |                     |
| 5.27  | 25         |                            |                     |
| 4.94  | 23         |                            |                     |
| 7.49  | 3          |                            |                     |
|       |            | 2 7.5 H-C*C-H              |                     |
|       |            | 1 1.5 H-C*CH*C-H           |                     |
| 6.11  | 1          |                            |                     |
|       |            | 2 7.5 H-C*C-H              |                     |
|       |            | 3 1.5 H-C*CH*C-H           |                     |
| 6.33  | 2          |                            |                     |
|       |            | 3 7.5 H-C*C-H              |                     |
|       |            | 1 7.5 H-C*C-H              |                     |
| 6.97  | 18         |                            |                     |
|       |            | 16 1.5 H-C*C*C-H           |                     |
| 6.87  | 15         |                            |                     |
|       |            | 16 7.5 H-C*C-H             |                     |
| 6.67  | 16         |                            |                     |
|       |            | 15 7.5 H-C*C-H             |                     |
|       |            | 18 1.5 H-C*C*C-H           |                     |
| 4.61  | 24         |                            |                     |
| 4.04  | 22         | diastereotopic -12.4 H-C-H |                     |
| 3.75  | 21         |                            |                     |
| 4.07  | 6          |                            |                     |
| 2.43  | 11         |                            |                     |
|       |            | 10 7.1 H-CH-CH-H           |                     |
| 2.08  | 10         |                            |                     |
|       |            | 11 7.1 H-CH-CH-H           |                     |

ChemNMR <sup>13</sup>C Estimation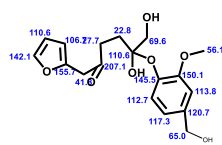

Estimation quality is indicated by color: **good**, **medium**, **rough**

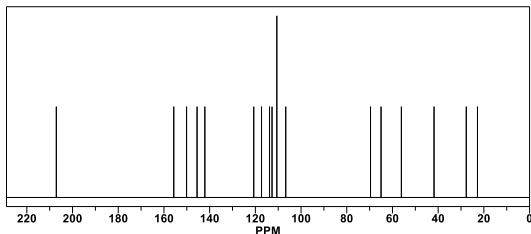

Protocol of the C-13 NMR Prediction: (Lib=S)

| Node | Shift | Base + Inc. | Comment (ppm rel. to TMS) |
|------|-------|-------------|---------------------------|
| C    | 155.7 | 143.0       | 2-furan                   |
|      |       | 9.5         | 1 -C                      |
|      |       | 3.2         | general corrections       |
| CH   | 142.1 | 143.0       | 2-furan                   |
|      |       | -1.8        | 1 -C                      |
|      |       | 0.9         | general corrections       |
| CH   | 106.7 | 109.9       | 2-furan                   |
|      |       | -4.2        | 1 -C                      |
|      |       | 1.0         | general corrections       |
| CH   | 110.6 | 109.9       | 2-furan                   |
|      |       | 0.7         | 1 -C                      |
|      |       | 0.0         | general corrections       |
| C    | 145.5 | 128.5       | 1-benzene                 |
|      |       | 30.3        | 1 -OCC                    |
|      |       | -14.4       | 1 -O-C                    |
|      |       | -1.1        | 1 -C-O                    |
|      |       | 2.2         | general corrections       |
| C    | 150.1 | 128.5       | 1-benzene                 |
|      |       | -14.3       | 1 -OCC                    |
|      |       | 33.5        | 1 -O-C                    |
|      |       | 0.2         | 1 -C-O                    |
|      |       | 2.2         | general corrections       |
| C    | 120.7 | 128.5       | 1-benzene                 |
|      |       | -8.4        | 1 -OCC                    |
|      |       | 1.0         | 1 -O-C                    |
|      |       | 12.4        | 1 -C-O                    |
|      |       | -12.8       | general corrections       |
| CH   | 113.8 | 128.5       | 1-benzene                 |
|      |       | 0.6         | 1 -OCC                    |
|      |       | -14.4       | 1 -O-C                    |
|      |       | -1.2        | 1 -C-O                    |
|      |       | 0.3         | general corrections       |
| CH   | 112.7 | 128.5       | 1-benzene                 |
|      |       | -14.3       | 1 -OCC                    |
|      |       | 1.0         | 1 -O-C                    |
|      |       | 0.2         | 1 -C-O                    |
|      |       | -2.7        | general corrections       |
| CH   | 117.3 | 128.5       | 1-benzene                 |
|      |       | 0.6         | 1 -OCC                    |
|      |       | -7.7        | 1 -O-C                    |
|      |       | -1.2        | 1 -C-O                    |
|      |       | -2.9        | general corrections       |
| C    | 207.1 | 193.0       | 1-carbonyl                |
|      |       | 7.6         | 1 -C-C                    |
|      |       | 6.5         | 1 -C                      |
|      |       | 0.0         | general corrections       |
| C    | 110.6 | -2.3        | aliphatic                 |
|      |       | 18.2        | 2 alpha -C                |
|      |       | 98.0        | 2 alpha -O                |
|      |       | 9.3         | 1 beta -1:C*C*C*C*C*C*1   |
|      |       | 9.4         | 1 beta -C                 |
|      |       | 10.1        | 1 beta -O                 |
|      |       | -2.7        | 1 gamma -C(=O)-C          |
|      |       | 0.3         | 1 delta -O                |
|      |       | -29.7       | general corrections       |
| CH2  | 65.0  | -2.3        | aliphatic                 |
|      |       | 24.3        | 1 alpha -1:C*C*C*C*C*C*1  |
|      |       | 49.0        | 1 alpha -O                |
|      |       | 0.3         | 1 delta -O                |
|      |       | -6.3        | general corrections       |
| CH2  | 69.6  | -2.3        | aliphatic                 |
|      |       | 9.1         | 1 alpha -C                |
|      |       | 49.0        | 1 alpha -O                |
|      |       | 9.4         | 1 beta -C                 |
|      |       | 20.2        | 2 beta -O                 |
|      |       | -2.6        | 1 gamma -1:C*C*C*C*C*C*1  |
|      |       | -2.5        | 1 gamma -C                |
|      |       | 0.0         | 1 delta -C(=O)-C          |
|      |       | -10.7       | general corrections       |
| CH3  | 56.1  | -2.3        | aliphatic                 |
|      |       | 49.0        | 1 alpha -O                |
|      |       | 9.3         | 1 beta -1:C*C*C*C*C*C*1   |
|      |       | 0.3         | 1 delta -O                |
|      |       | -0.2        | general corrections       |
| CH2  | 41.8  | -2.3        | aliphatic                 |
|      |       | 17.0        | 1 alpha -1:C-O-C=C-C=1    |
|      |       | 29.3        | 1 alpha -C(=O)-C          |
|      |       | -2.5        | 1 gamma -C                |
|      |       | 0.3         | 1 delta -C                |
| CH2  | 27.7  | -2.3        | aliphatic                 |
|      |       | 29.3        | 1 alpha -C(=O)-C          |
|      |       | 9.1         | 1 alpha -C                |
|      |       | 9.4         | 1 beta -C                 |
|      |       | -5.0        | 1 gamma -1:C-O-C=C-C=1    |
|      |       | -2.5        | 1 gamma -C                |
|      |       | -12.4       | 2 gamma -O                |
|      |       | 0.3         | 1 delta -1:C*C*C*C*C*C*1  |
|      |       | 0.3         | 1 delta -O                |
|      |       | 1.5         | general corrections       |
| CH2  | 22.8  | -2.3        | aliphatic                 |
|      |       | 18.2        | 2 alpha -C                |
|      |       | 0.5         | 1 beta -C(=O)-C           |
|      |       | 9.4         | 1 beta -C                 |
|      |       | 20.2        | 2 beta -O                 |
|      |       | -2.6        | 1 gamma -1:C*C*C*C*C*C*1  |
|      |       | -6.2        | 1 gamma -O                |
|      |       | -0.3        | 1 delta -1:C-O-C=C-C=1    |
|      |       | -14.1       | general corrections       |

Figure S6. calculated NMR spectra of model M6

ChemNMR <sup>1</sup>H Estimation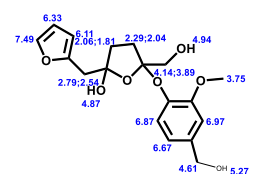

Estimation quality is indicated by color: **good**, **medium**, **rough**

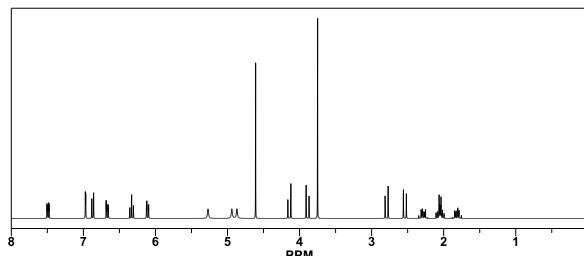

Protocol of the H-1 NMR Prediction (Lib=SU Solvent=DMSO 300 MHz):

| Node | Shift         | Base + Inc. | Comment (ppm rel. to TMS)            |
|------|---------------|-------------|--------------------------------------|
| OH   | 4.87          | 4.20        | alcohol                              |
|      |               | 0.85        | 1 -CCC*R                             |
|      |               | -0.18       | general corrections                  |
| OH   | 4.94          | 4.20        | alcohol                              |
|      |               | 1.20        | 1 -CCO                               |
|      |               | -0.46       | general corrections                  |
| OH   | 5.27          | 4.20        | alcohol                              |
|      |               | 1.10        | 1 -C-C*R                             |
|      |               | -0.03       | general corrections                  |
| CH   | 7.49          | 7.38        | 2-furan                              |
|      |               | -0.17       | 1 -C                                 |
|      |               | 0.28        | general corrections                  |
| CH   | 6.11          | 6.30        | 2-furan                              |
|      |               | -0.42       | 1 -C                                 |
|      |               | 0.23        | general corrections                  |
| CH   | 6.33          | 6.30        | 2-furan                              |
|      |               | -0.12       | 1 -C                                 |
|      |               | 0.15        | general corrections                  |
| CH2  | 2.29,2.045000 | 1.85        | tetrahydrofuran                      |
|      |               | 0.38        | 1 beta -O-1:C*C*C*C*1 from methylene |
|      |               | -0.06       | 1 beta -C from methylene             |
| CH2  | 2.06,1.815000 | 1.85        | tetrahydrofuran                      |
|      |               | 0.15        | 1 beta -O from methylene             |
|      |               | -0.06       | 1 beta -C from methylene             |
| CH   | 6.97          | 7.26        | 1-benzene                            |
|      |               | 0.00        | 1 -O-C                               |
|      |               | -0.38       | 1 -O-C                               |
|      |               | 0.00        | 1 -C-O                               |
|      |               | 0.09        | general corrections                  |
| CH   | 6.87          | 7.26        | 1-benzene                            |
|      |               | -0.38       | 1 -O-C                               |
|      |               | 0.00        | 1 -O-C                               |
|      |               | 0.03        | 1 -C-O                               |
|      |               | -0.04       | general corrections                  |
| CH   | 6.67          | 7.26        | 1-benzene                            |
|      |               | 0.00        | 1 -O-C                               |
|      |               | -0.32       | 1 -O-C                               |
|      |               | 0.00        | 1 -C-O                               |
|      |               | -0.27       | general corrections                  |
| CH2  | 4.14,3.895000 | 1.37        | methylene                            |
|      |               | 2.20        | 1 alpha -O                           |
|      |               | 0.38        | 1 beta -O-1:C*C*C*C*1                |
|      |               | 0.13        | 1 beta -O-C                          |
|      |               | -0.06       | 1 beta -C                            |
| CH2  | 4.61          | 1.37        | methylene                            |
|      |               | 1.22        | 1 alpha -1:C*C*C*C*1                 |
|      |               | 2.20        | 1 alpha -O                           |
|      |               | -0.18       | general corrections                  |
| CH3  | 3.75          | 0.86        | methyl                               |
|      |               | 2.87        | 1 alpha -O-1:C*C*C*C*1               |
|      |               | 0.02        | general corrections                  |
| CH2  | 2.79,2.535000 | 1.37        | methylene                            |
|      |               | 1.07        | 1 alpha -1:C-O-C=C=1                 |
|      |               | 0.13        | 1 beta -O-C                          |
|      |               | 0.15        | 1 beta -O                            |
|      |               | -0.06       | 1 beta -C                            |

## 1H NMR Coupling Constant Prediction

| shift | atom index | coupling partner, constant and vector |
|-------|------------|---------------------------------------|
| 4.87  | 11         |                                       |
| 4.94  | 23         |                                       |
| 5.27  | 25         |                                       |
| 7.49  | 3          |                                       |
|       |            | 2 7.5 H-C*C-H                         |
|       |            | 1 1.5 H-C*CH*C-H                      |
| 6.11  | 1          |                                       |
|       |            | 2 7.5 H-C*C-H                         |
|       |            | 3 1.5 H-C*CH*C-H                      |
| 6.33  | 2          |                                       |
|       |            | 3 7.5 H-C*C-H                         |
|       |            | 1 7.5 H-C*C-H                         |
| 2.17  | 9          | diastereotopic -12.4 H-C-H            |
|       |            | 10 7.1 H-CH-CH-H                      |
| 1.94  | 10         | diastereotopic -12.4 H-C-H            |
|       |            | 9 7.1 H-CH-CH-H                       |
| 6.97  | 18         |                                       |
|       |            | 16 1.5 H-C*C*H                        |
| 6.87  | 15         |                                       |
|       |            | 16 7.5 H-C*C-H                        |
| 6.67  | 16         |                                       |
|       |            | 15 7.5 H-C*C-H                        |
|       |            | 18 1.5 H-C*C*H                        |
| 4.02  | 22         | diastereotopic -12.4 H-C-H            |
| 4.61  | 24         |                                       |
| 3.75  | 21         |                                       |
| 2.66  | 6          | diastereotopic -12.4 H-C-H            |

ChemNMR <sup>13</sup>C Estimation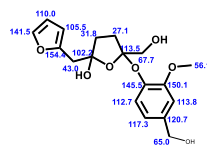

Estimation quality is indicated by color: **good**, **medium**, **rough**

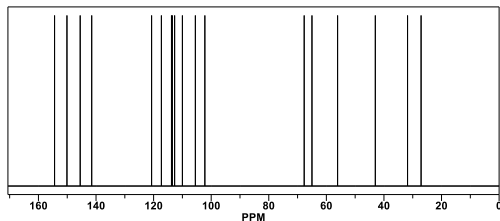

Protocol of the C-13 NMR Prediction: (Lib=S)

| Node | Shift | Base + Inc. | Comment (ppm rel. to TMS)           |
|------|-------|-------------|-------------------------------------|
| C    | 113.5 | -8.5        | tetrahydrofuran                     |
|      |       | 18.2        | 2 alpha -C from aliphatic           |
|      |       | 98.0        | 2 alpha -O from aliphatic           |
|      |       | 9.3         | 1 beta -1:C*C*C*C*1 from aliphatic  |
|      |       | 18.8        | 2 beta -C from aliphatic            |
|      |       | 10.1        | 1 beta -O from aliphatic            |
|      |       | -2.5        | 1 gamma -C from aliphatic           |
|      |       | -6.2        | 1 gamma -O from aliphatic           |
|      |       | -0.3        | 1 delta -1:C-O-C=C=1 from aliphatic |
|      |       | 0.3         | 1 delta -O from aliphatic           |
|      |       | -23.7       | general corrections                 |
| C    | 102.2 | -8.5        | tetrahydrofuran                     |
|      |       | 18.2        | 2 alpha -C from aliphatic           |
|      |       | 98.0        | 2 alpha -O from aliphatic           |
|      |       | 7.5         | 1 beta -1:C-O-C=C=1 from aliphatic  |
|      |       | 18.8        | 2 beta -C from aliphatic            |
|      |       | -2.5        | 1 gamma -C from aliphatic           |
|      |       | -6.2        | 1 gamma -O from aliphatic           |
|      |       | 0.3         | 1 delta -1:C*C*C*C*1 from aliphatic |
|      |       | 0.3         | 1 delta -O from aliphatic           |
|      |       | -23.7       | general corrections                 |
| C    | 154.4 | 143.0       | 2-furan                             |
|      |       | 13.6        | 1 -CCCC                             |
|      |       | -2.2        | general corrections                 |
| CH   | 141.5 | 143.0       | 2-furan                             |
|      |       | -2.4        | 1 -CCCC                             |
| CH   | 105.5 | 109.9       | general corrections                 |
|      |       | 109.9       | 2-furan                             |
|      |       | -5.4        | 1 -CCCC                             |
| CH   | 110.0 | 109.9       | general corrections                 |
|      |       | 109.9       | 2-furan                             |
|      |       | 0.1         | 1 -CCCC                             |
|      |       | 0.0         | general corrections                 |
| CH2  | 27.1  | -11.2       | tetrahydrofuran                     |
|      |       | 18.2        | 2 alpha -C from aliphatic           |
|      |       | 18.8        | 2 beta -C from aliphatic            |
|      |       | 20.2        | 2 beta -O from aliphatic            |
|      |       | -2.6        | 1 gamma -1:C*C*C*C*1 from aliphatic |
|      |       | -2.5        | 1 gamma -C from aliphatic           |
|      |       | -12.4       | 2 gamma -O from aliphatic           |
|      |       | -0.3        | 1 delta -1:C-O-C=C=1 from aliphatic |
|      |       | -1.1        | general corrections                 |
| CH2  | 31.8  | -11.2       | tetrahydrofuran                     |
|      |       | 18.2        | 2 alpha -C from aliphatic           |
|      |       | 18.8        | 2 beta -C from aliphatic            |
|      |       | 20.2        | 2 beta -O from aliphatic            |
|      |       | -5.0        | 1 gamma -1:C-O-C=C=1 from aliphatic |
|      |       | -2.5        | 1 gamma -C from aliphatic           |
|      |       | -6.2        | 1 gamma -O from aliphatic           |
|      |       | 0.3         | 1 delta -1:C*C*C*C*1 from aliphatic |
|      |       | 0.3         | 1 delta -O from aliphatic           |
|      |       | -1.1        | general corrections                 |
| C    | 145.5 | 128.5       | 1-benzene                           |
|      |       | 30.3        | 1 -OCC                              |
|      |       | -14.4       | 1 -O-C                              |
|      |       | -1.1        | 1 -C-O                              |
|      |       | 2.2         | general corrections                 |
| C    | 150.1 | 128.5       | 1-benzene                           |
|      |       | -14.3       | 1 -OCC                              |
|      |       | 33.5        | 1 -O-C                              |
|      |       | 0.2         | 1 -C-O                              |
|      |       | 2.2         | general corrections                 |
| C    | 120.7 | 128.5       | 1-benzene                           |
|      |       | -8.4        | 1 -OCC                              |
|      |       | 1.0         | 1 -O-C                              |
|      |       | 12.4        | 1 -C-O                              |
|      |       | -12.8       | general corrections                 |
| CH   | 113.8 | 128.5       | 1-benzene                           |
|      |       | 0.6         | 1 -OCC                              |
|      |       | -14.4       | 1 -O-C                              |
|      |       | -1.2        | 1 -C-O                              |
|      |       | 0.3         | general corrections                 |
| CH   | 112.7 | 128.5       | 1-benzene                           |
|      |       | -14.3       | 1 -OCC                              |
|      |       | 1.0         | 1 -O-C                              |
|      |       | 0.2         | 1 -C-O                              |
|      |       | -2.7        | general corrections                 |
| CH   | 117.3 | 128.5       | 1-benzene                           |
|      |       | 0.6         | 1 -OCC                              |
|      |       | -17.7       | 1 -O-C                              |
|      |       | -1.2        | 1 -C-O                              |
|      |       | -2.9        | general corrections                 |
| CH2  | 67.7  | -2.3        | aliphatic                           |
|      |       | 9.1         | 1 alpha -C                          |
|      |       | 49.0        | 1 alpha -O                          |
|      |       | 9.4         | 1 beta -C                           |
|      |       | 20.2        | 2 beta -O                           |
|      |       | -2.6        | 1 gamma -1:C*C*C*C*1                |
|      |       | -5.0        | 2 gamma -C                          |
|      |       | 0.3         | 1 delta -C                          |
|      |       | 0.3         | 1 delta -O                          |
|      |       | -10.7       | general corrections                 |
| CH2  | 65.0  | -2.3        | aliphatic                           |
|      |       | 24.3        | 1 alpha -1:C*C*C*C*1                |
|      |       | 49.0        | 1 alpha -O                          |
|      |       | 0.3         | 1 delta -O                          |
|      |       | -6.3        | general corrections                 |
| CH3  | 56.1  | -2.3        | aliphatic                           |
|      |       | 49.0        | 1 alpha -O                          |
|      |       | 9.3         | 1 beta -1:C*C*C*C*1                 |
|      |       | 0.3         | 1 delta -O                          |
|      |       | -0.2        | general corrections                 |
| CH2  | 43.0  | -2.3        | aliphatic                           |
|      |       | 17.0        | 1 alpha -1:C-O-C=C=1                |
|      |       | 9.1         | 1 alpha -C                          |
|      |       | 9.4         | 1 beta -C                           |
|      |       | 20.2        | 2 beta -O                           |
|      |       | -5.0        | 2 gamma -C                          |
|      |       | 0.3         | 1 delta -C                          |
|      |       | 0.3         | 1 delta -O                          |
|      |       | -6.0        | general corrections                 |

Figure S7. calculated NMR spectra of model M7

| Node | Shift | Base + Inc. | Comment (ppm rel. to TMS) |
|------|-------|-------------|---------------------------|
|------|-------|-------------|---------------------------|

| Node               | Shift | Base + Inc. | Comment (ppm rel. to TMS)                  |
|--------------------|-------|-------------|--------------------------------------------|
| OR                 | 4.94  | 4.20        | alcohol                                    |
|                    |       | 1.20        | 1 -CCO                                     |
|                    |       | -0.46       | general corrections                        |
| OR                 | 5.27  | 4.20        | alcohol                                    |
|                    |       | 1.10        | 1 -C-C*H                                   |
|                    |       | -0.03       | general corrections                        |
| OR                 | 5.27  | 4.20        | alcohol                                    |
|                    |       | 1.10        | 1 -C-C*H                                   |
|                    |       | -0.03       | general corrections                        |
| CH                 | 7.49  | 7.38        | 2-furan                                    |
|                    |       | -0.17       | 1 -C                                       |
|                    |       | 0.28        | general corrections                        |
| CH                 | 6.11  | 6.30        | 2-furan                                    |
|                    |       | -0.42       | 1 -C                                       |
|                    |       | 0.23        | general corrections                        |
| CH                 | 6.33  | 6.30        | 2-furan                                    |
|                    |       | -0.12       | 1 -C                                       |
|                    |       | 0.13        | general corrections                        |
| CH2 2.29, 2.045000 |       | 1.85        | tetrahydrofuran                            |
|                    |       | 0.38        | 1 beta -0.1.C*CH*CH*CH*CH*1 from methylene |
|                    |       | -0.06       | 1 beta -C from methylene                   |
| CH2 2.29, 2.045000 |       | 1.85        | tetrahydrofuran                            |
|                    |       | 0.38        | 1 beta -0.1.C*CH*CH*CH*CH*1 from methylene |
|                    |       | -0.06       | 1 beta -C from methylene                   |
| CH                 | 6.97  | 7.26        | 1-benzene                                  |
|                    |       | 0.00        | 1 -O-C                                     |
|                    |       | -0.38       | 1 -O-C                                     |
|                    |       | 0.00        | 1 -C-O                                     |
|                    |       | 0.09        | general corrections                        |
| CH                 | 6.87  | 7.26        | 1-benzene                                  |
|                    |       | -0.38       | 1 -O-C                                     |
|                    |       | 0.00        | 1 -O-C                                     |
|                    |       | 0.03        | 1 -C-O                                     |
|                    |       | -0.04       | general corrections                        |
| CH                 | 6.97  | 7.26        | 1-benzene                                  |
|                    |       | 0.00        | 1 -O-C                                     |
|                    |       | -0.38       | 1 -O-C                                     |
|                    |       | 0.00        | 1 -C-O                                     |
|                    |       | 0.09        | general corrections                        |
| CH                 | 6.67  | 7.26        | 1-benzene                                  |
|                    |       | 0.00        | 1 -O-C                                     |
|                    |       | -0.32       | 1 -O-C                                     |
|                    |       | 0.00        | 1 -C-O                                     |
|                    |       | -0.27       | general corrections                        |
| CH                 | 6.87  | 7.26        | 1-benzene                                  |
|                    |       | -0.38       | 1 -O-C                                     |
|                    |       | 0.00        | 1 -O-C                                     |
|                    |       | 0.03        | 1 -C-O                                     |
|                    |       | -0.04       | general corrections                        |
| CH                 | 6.67  | 7.26        | 1-benzene                                  |
|                    |       | 0.00        | 1 -O-C                                     |
|                    |       | -0.32       | 1 -O-C                                     |
|                    |       | 0.00        | 1 -C-O                                     |
|                    |       | -0.27       | general corrections                        |
| CH2 4.14, 3.895000 |       | 2.20        | methylene                                  |
|                    |       | 2.20        | 1 alpha -O                                 |
|                    |       | 0.38        | 1 beta -0.1.C*CH*CH*CH*CH*1                |
|                    |       | 0.13        | 1 beta -C                                  |
|                    |       | -0.06       | 1 beta -C                                  |
| CH2 4.61           |       | 1.37        | methylene                                  |
|                    |       | 1.22        | 1 alpha -0.1.C*CH*CH*CH*1                  |
|                    |       | 0.20        | 1 alpha -O                                 |
|                    |       | -0.18       | general corrections                        |
| CH2 4.61           |       | 1.37        | methylene                                  |
|                    |       | 1.22        | 1 alpha -0.1.C*CH*CH*CH*1                  |
|                    |       | 0.20        | 1 alpha -O                                 |
|                    |       | -0.18       | general corrections                        |
| CH3 3.75           |       | 0.86        | methyl                                     |
|                    |       | 0.87        | 1 alpha -0.1.C*CH*CH*CH*CH*1               |
|                    |       | 0.02        | general corrections                        |
| CH3 3.75           |       | 0.86        | methyl                                     |
|                    |       | 0.87        | 1 alpha -0.1.C*CH*CH*CH*CH*1               |
|                    |       | 0.02        | general corrections                        |
| CH2 3.02, 2.765000 |       | 1.37        | methylene                                  |
|                    |       | 1.07        | 1 alpha -0.1.C-O-CH-C-CH-1                 |
|                    |       | 0.38        | 1 beta -0.1.C*CH*CH*CH*CH*1                |
|                    |       | 0.13        | 1 beta -O-C                                |
|                    |       | -0.06       | 1 beta -C                                  |

```
shift  atom index  coupling partner, constant and vector
```

|      |    |                |                                          |
|------|----|----------------|------------------------------------------|
| 5.94 | 31 |                |                                          |
| 5.27 | 33 |                |                                          |
| 5.27 | 35 |                |                                          |
| 7.49 | 3  |                |                                          |
|      |    | 2              | 7.5 H-C <sup>+</sup> C-H                 |
|      |    | 1              | 1.5 H-C <sup>+</sup> CH <sup>+</sup> C-H |
| 6.11 | 1  |                |                                          |
|      |    | 2              | 7.5 H-C <sup>+</sup> C-H                 |
|      |    | 3              | 1.5 H-C <sup>+</sup> CH <sup>+</sup> C-H |
| 6.33 | 2  |                |                                          |
|      |    | 3              | 7.5 H-C <sup>+</sup> C-H                 |
|      |    | 1              | 7.5 H-C <sup>+</sup> C-H                 |
| 2.17 | 9  | diastereotopic | -12.4 H-C-H                              |
|      |    | 10             | 7.1 H-CH-CH-H                            |
| 2.17 | 10 | diastereotopic | -12.4 H-C-H                              |
|      |    | 9              | 7.1 H-CH-CH-H                            |
| 6.97 | 25 |                |                                          |
|      |    | 23             | 1.5 H-C <sup>+</sup> C <sup>+</sup> C-H  |
| 6.87 | 22 |                |                                          |
|      |    | 23             | 7.5 H-C <sup>+</sup> C-H                 |
| 6.97 | 16 |                |                                          |
|      |    | 14             | 1.5 H-C <sup>+</sup> C <sup>+</sup> C-H  |
| 6.67 | 23 |                |                                          |
|      |    | 22             | 7.5 H-C <sup>+</sup> C-H                 |
|      |    | 25             | 1.5 H-C <sup>+</sup> C <sup>+</sup> C-H  |
| 6.87 | 13 |                |                                          |
|      |    | 14             | 7.5 H-C <sup>+</sup> C-H                 |
| 6.67 | 14 |                |                                          |
|      |    | 13             | 7.5 H-C <sup>+</sup> C-H                 |
|      |    | 16             | 1.5 H-C <sup>+</sup> C <sup>+</sup> C-H  |
| 4.02 | 30 | diastereotopic | -12.4 H-C-H                              |
| 4.61 | 32 |                |                                          |
| 4.62 | 34 |                |                                          |
| 3.75 | 19 |                |                                          |
| 3.75 | 28 |                |                                          |
| 2.89 | 6  | diastereotopic | -12.4 H-C-H                              |

The chemical structure of compound 6 is shown with its <sup>13</sup>C NMR peaks labeled as follows:

- <sup>13</sup>C NMR peaks (ppm): 149.8, 119.8, 105.5, 79.3, 77.4, 67.7, 154.9, 111.5, 113.8, 112.360.4, 117.3, 112.3, 107.7, 105.1, 100.0, 113.8, 107.7, 105.0, 117.3, 113.8, 107.7.

| Node | Shift | Base + Inc. | Comment (ppn rel. to TMS) |
|------|-------|-------------|---------------------------|
| 1    |       |             |                           |
| 2    |       |             |                           |
| 3    |       |             |                           |
| 4    |       |             |                           |
| 5    |       |             |                           |
| 6    |       |             |                           |
| 7    |       |             |                           |
| 8    |       |             |                           |
| 9    |       |             |                           |
| 10   |       |             |                           |
| 11   |       |             |                           |
| 12   |       |             |                           |
| 13   |       |             |                           |
| 14   |       |             |                           |
| 15   |       |             |                           |
| 16   |       |             |                           |
| 17   |       |             |                           |
| 18   |       |             |                           |
| 19   |       |             |                           |
| 20   |       |             |                           |
| 21   |       |             |                           |
| 22   |       |             |                           |
| 23   |       |             |                           |
| 24   |       |             |                           |
| 25   |       |             |                           |
| 26   |       |             |                           |
| 27   |       |             |                           |
| 28   |       |             |                           |
| 29   |       |             |                           |
| 30   |       |             |                           |
| 31   |       |             |                           |
| 32   |       |             |                           |
| 33   |       |             |                           |
| 34   |       |             |                           |
| 35   |       |             |                           |
| 36   |       |             |                           |
| 37   |       |             |                           |
| 38   |       |             |                           |
| 39   |       |             |                           |
| 40   |       |             |                           |
| 41   |       |             |                           |
| 42   |       |             |                           |
| 43   |       |             |                           |
| 44   |       |             |                           |
| 45   |       |             |                           |
| 46   |       |             |                           |
| 47   |       |             |                           |
| 48   |       |             |                           |
| 49   |       |             |                           |
| 50   |       |             |                           |
| 51   |       |             |                           |
| 52   |       |             |                           |
| 53   |       |             |                           |
| 54   |       |             |                           |
| 55   |       |             |                           |
| 56   |       |             |                           |
| 57   |       |             |                           |
| 58   |       |             |                           |
| 59   |       |             |                           |
| 60   |       |             |                           |
| 61   |       |             |                           |
| 62   |       |             |                           |
| 63   |       |             |                           |
| 64   |       |             |                           |
| 65   |       |             |                           |
| 66   |       |             |                           |
| 67   |       |             |                           |
| 68   |       |             |                           |
| 69   |       |             |                           |
| 70   |       |             |                           |
| 71   |       |             |                           |
| 72   |       |             |                           |
| 73   |       |             |                           |
| 74   |       |             |                           |
| 75   |       |             |                           |
| 76   |       |             |                           |
| 77   |       |             |                           |
| 78   |       |             |                           |
| 79   |       |             |                           |
| 80   |       |             |                           |
| 81   |       |             |                           |
| 82   |       |             |                           |
| 83   |       |             |                           |
| 84   |       |             |                           |
| 85   |       |             |                           |
| 86   |       |             |                           |
| 87   |       |             |                           |
| 88   |       |             |                           |
| 89   |       |             |                           |
| 90   |       |             |                           |
| 91   |       |             |                           |
| 92   |       |             |                           |
| 93   |       |             |                           |
| 94   |       |             |                           |
| 95   |       |             |                           |
| 96   |       |             |                           |
| 97   |       |             |                           |
| 98   |       |             |                           |
| 99   |       |             |                           |
| 100  |       |             |                           |

| CR       | 113.8 | Base + Inc. | Comment (ppm rel. to TMS)                                                                          |
|----------|-------|-------------|----------------------------------------------------------------------------------------------------|
|          | -8.5  |             | tetrahydrofuran                                                                                    |
|          | 18.2  | 2           | alpha -C from aliphatic                                                                            |
|          | 90.0  | 2           | alpha -O from aliphatic                                                                            |
|          | 9.3   | 1           | beta -1-C <sup>4</sup> C <sup>4</sup> C <sup>4</sup> C <sup>4</sup> C <sup>4</sup> from aliphatic  |
|          | 18.8  | 2           | beta -O from aliphatic                                                                             |
|          | 10.1  | 1           | beta -O from aliphatic                                                                             |
|          | -2.5  | 1           | gamma -1-C <sup>4</sup> C <sup>4</sup> C <sup>4</sup> C <sup>4</sup> C <sup>4</sup> from aliphatic |
|          | -6.2  | 1           | gamma -O from aliphatic                                                                            |
|          | 0.3   | 1           | delta -1-C <sup>4</sup> C <sup>4</sup> C <sup>4</sup> C <sup>4</sup> C <sup>4</sup> from aliphatic |
|          | -0.3  | 1           | delta -1-C-O-C-O-C-O from aliphatic                                                                |
|          | -0.3  | 1           | delta -O from aliphatic                                                                            |
|          | -23.7 |             | general corrections                                                                                |
| CR 111.8 | -95.0 |             | tetrahydrofuran                                                                                    |
|          | 18.2  | 2           | alpha -C from aliphatic                                                                            |
|          | 9.3   | 1           | beta -1-C <sup>4</sup> C <sup>4</sup> C <sup>4</sup> C <sup>4</sup> C <sup>4</sup> from aliphatic  |
|          | 7.5   | 1           | beta -1-C-O-C-O-C-O from aliphatic                                                                 |
|          | 18.8  | 2           | beta -O from aliphatic                                                                             |
|          | -2.5  | 1           | gamma -C from aliphatic                                                                            |
|          | -6.2  | 1           | gamma -O from aliphatic                                                                            |
|          | 0.3   | 1           | delta -1-C <sup>4</sup> C <sup>4</sup> C <sup>4</sup> C <sup>4</sup> C <sup>4</sup> from aliphatic |
|          | 0.6   | 1           | delta -O from aliphatic                                                                            |
|          | -23.7 |             | general corrections                                                                                |
| CR 154.4 | 12.4  | 2           | -furan                                                                                             |
|          | 13.6  | 1           | -1-C <sup>4</sup> OCC                                                                              |
|          | 10.2  |             | general corrections                                                                                |
| CR 141.5 | 143.0 |             | -furan                                                                                             |
|          | -1.4  | 1           | -1-C <sup>4</sup> OCC                                                                              |
| CR 105.5 | 105.9 |             | -furan                                                                                             |
|          | -3.4  | 1           | -1-C <sup>4</sup> OCC                                                                              |
| CR 110.0 | 105.9 |             | -furan                                                                                             |
|          | 0.1   | 1           | -1-C <sup>4</sup> OCC                                                                              |
|          | 0.0   |             | general corrections                                                                                |
| CR 27.4  | -11.2 |             | tetrahydrofuran                                                                                    |
|          | 18.2  | 2           | alpha -C from aliphatic                                                                            |
|          | 18.8  | 2           | beta -C from aliphatic                                                                             |
|          | 20.2  | 2           | beta -O from aliphatic                                                                             |
|          | -2.6  | 1           | gamma -1-C <sup>4</sup> C <sup>4</sup> C <sup>4</sup> C <sup>4</sup> C <sup>4</sup> from aliphatic |
|          | -2.5  | 1           | gamma -O from aliphatic                                                                            |
|          | -12.4 | 2           | gamma -O from aliphatic                                                                            |
|          | 0.3   | 1           | delta -1-C <sup>4</sup> C <sup>4</sup> C <sup>4</sup> C <sup>4</sup> C <sup>4</sup> from aliphatic |
|          | -0.3  | 1           | delta -1-C-O-C-O-C-O from aliphatic                                                                |
|          | -0.3  |             | general corrections                                                                                |
| CR 29.2  | -11.2 |             | tetrahydrofuran                                                                                    |
|          | 18.2  | 2           | alpha -C from aliphatic                                                                            |
|          | 18.8  | 2           | beta -C from aliphatic                                                                             |
|          | 20.2  | 2           | beta -O from aliphatic                                                                             |
|          | -2.6  | 1           | gamma -1-C <sup>4</sup> C <sup>4</sup> C <sup>4</sup> C <sup>4</sup> C <sup>4</sup> from aliphatic |
|          | -5.0  | 1           | gamma -1-C-O-C-O-C-O from aliphatic                                                                |
|          | -2.5  | 1           | gamma -O from aliphatic                                                                            |
|          | -6.2  | 1           | gamma -O from aliphatic                                                                            |
|          | 0.3   | 1           | delta -1-C <sup>4</sup> C <sup>4</sup> C <sup>4</sup> C <sup>4</sup> C <sup>4</sup> from aliphatic |
|          | 0.3   | 1           | delta -O from aliphatic                                                                            |
|          | 11.1  |             | general corrections                                                                                |
| CR 145.5 | 128.5 |             | 1-benzene                                                                                          |
|          | 30.3  | 1           | -OCC                                                                                               |
|          | -14.4 | 1           | -O-C                                                                                               |
|          | -1.1  | 1           | -C-O                                                                                               |
|          | 2.2   |             | general corrections                                                                                |
| CR 145.5 | 128.5 |             | 1-benzene                                                                                          |
|          | 30.3  | 1           | -OCC                                                                                               |
|          | -14.4 | 1           | -O-C                                                                                               |
|          | -1.1  | 1           | -C-O                                                                                               |
|          | 2.2   |             | general corrections                                                                                |
| CR 150.1 | 128.5 |             | 1-benzene                                                                                          |
|          | -14.3 | 1           | -OCC                                                                                               |
|          | 33.5  | 1           | -C-O                                                                                               |
|          | 0.2   | 1           | -C-O                                                                                               |
|          | 2.2   |             | general corrections                                                                                |
| CR 150.1 | 128.5 |             | 1-benzene                                                                                          |
|          | -14.3 | 1           | -OCC                                                                                               |
|          | 33.5  | 1           | -O-C                                                                                               |
|          | 0.2   | 1           | -C-O                                                                                               |
|          | 2.2   |             | general corrections                                                                                |
| CR 120.7 | -18.4 |             | 1-benzene                                                                                          |
|          | -1.0  | 1           | -OCC                                                                                               |
|          | 1.0   | 1           | -O-C                                                                                               |
|          | 12.4  | 1           | -C-O                                                                                               |
|          | -12.8 |             | general corrections                                                                                |
| CR 120.7 | -18.4 |             | 1-benzene                                                                                          |
|          | -8.4  | 1           | -OCC                                                                                               |
|          | 1.0   | 1           | -O-C                                                                                               |
|          | 12.4  | 1           | -C-O                                                                                               |
|          | -12.8 |             | general corrections                                                                                |
| CR 113.8 | 128.5 |             | 1-benzene                                                                                          |
|          | 0.6   | 1           | -OCC                                                                                               |
|          | -14.4 | 1           | -O-C                                                                                               |
|          | -1.2  | 1           | -C-O                                                                                               |
|          | 0.3   |             | general corrections                                                                                |
| CR 112.7 | -14.3 |             | 1-benzene                                                                                          |
|          | -14.3 | 1           | -OCC                                                                                               |
|          | 1.0   | 1           | -O-C                                                                                               |
|          | 0.2   | 1           | -C-O                                                                                               |
|          | 2.7   |             | general corrections                                                                                |
| CR 113.8 | 128.5 |             | 1-benzene                                                                                          |
|          | 0.6   | 1           | -OCC                                                                                               |
|          | -14.4 | 1           | -O-C                                                                                               |
|          | -1.2  | 1           | -C-O                                                                                               |
|          | 0.3   |             | general corrections                                                                                |
| CR 117.3 | 128.5 |             | 1-benzene                                                                                          |
|          | 0.6   | 1           | -OCC                                                                                               |
|          | -7.7  | 1           | -O-C                                                                                               |
|          | -1.2  | 1           | -C-O                                                                                               |
|          | -2.9  |             | general corrections                                                                                |
| CR 112.7 | -14.3 |             | 1-benzene                                                                                          |
|          | -14.3 | 1           | -OCC                                                                                               |
|          | 1.0   | 1           | -O-C                                                                                               |
|          | 0.2   | 1           | -C-O                                                                                               |
|          | 2.7   |             | general corrections                                                                                |
| CR 117.3 | 128.5 |             | 1-benzene                                                                                          |
|          | 0.6   | 1           | -OCC                                                                                               |
|          | -7.7  | 1           | -O-C                                                                                               |
|          | -1.2  | 1           | -C-O                                                                                               |
|          | -2.9  |             | general corrections                                                                                |
| CR 67.7  | -2.3  |             | aliphatic                                                                                          |
|          | 9.1   | 1           | alpha -C                                                                                           |
|          | 49.0  | 1           | alpha -O                                                                                           |
|          | 9.4   | 1           | beta -C                                                                                            |
|          | 20.2  | 2           | beta -O                                                                                            |
|          | -2.6  | 1           | gamma -1-C <sup>4</sup> C <sup>4</sup> C <sup>4</sup> C <sup>4</sup> C <sup>4</sup> from aliphatic |
|          | -5.0  | 2           | gamma -C                                                                                           |
|          | 0.3   | 1           | delta -C                                                                                           |
|          | 0.3   | 1           | delta -O                                                                                           |
|          | -10.7 |             | general corrections                                                                                |
| CR2 65.0 | -2.3  |             | aliphatic                                                                                          |
|          | 9.1   | 1           | alpha -C                                                                                           |
|          | 49.0  | 1           | alpha -O                                                                                           |
|          | 9.3   | 1           | beta -C                                                                                            |
|          | 20.2  | 2           | beta -O                                                                                            |
|          | -2.6  | 1           | gamma -1-C <sup>4</sup> C <sup>4</sup> C <sup>4</sup> C <sup>4</sup> C <sup>4</sup> from aliphatic |
|          | -5.0  | 2           | gamma -C                                                                                           |
|          | 0.3   | 1           | delta -C                                                                                           |
|          | 0.3   | 1           | delta -O                                                                                           |
|          | -10.7 |             | general corrections                                                                                |
| CR2 65.0 | -2.3  |             | aliphatic                                                                                          |
|          | 9.1   | 1           | alpha -C                                                                                           |
|          | 49.0  | 1           | alpha -O                                                                                           |
|          | 9.3   | 1           | beta -C                                                                                            |
|          | 20.2  | 2           | beta -O                                                                                            |
|          | -2.6  | 1           | gamma -1-C <sup>4</sup> C <sup>4</sup> C <sup>4</sup> C <sup>4</sup> C <sup>4</sup> from aliphatic |
|          | -5.0  | 2           | gamma -C                                                                                           |
|          | 0.3   | 1           | delta -C                                                                                           |
|          | 0.3   | 1           | delta -O                                                                                           |
|          | -10.7 |             | general corrections                                                                                |
| CR2 67.7 | -2.3  |             | aliphatic                                                                                          |
|          | 9.1   | 1           | alpha -C                                                                                           |
|          | 49.0  | 1           | alpha -O                                                                                           |
|          | 9.4   | 1           | beta -C                                                                                            |
|          | 20.2  | 2           | beta -O                                                                                            |
|          | -2.6  | 1           | gamma -1-C <sup>4</sup> C <sup>4</sup> C <sup>4</sup> C <sup>4</sup> C <sup>4</sup> from aliphatic |
|          | -5.0  | 2           | gamma -C                                                                                           |
|          | 0.3   | 1           | delta -C                                                                                           |
|          | 0.3   | 1           | delta -O                                                                                           |
|          | -10.7 |             | general corrections                                                                                |
| CR2 45.4 | -2.3  |             | aliphatic                                                                                          |
|          | 9.1   | 1           | alpha -C                                                                                           |
|          | 49.0  | 1           | alpha -O                                                                                           |
|          | 9.3   | 1           | beta -C                                                                                            |
|          | 20.2  | 2           | beta -O                                                                                            |
|          | -2.6  | 1           | gamma -1-C <sup>4</sup> C <sup>4</sup> C <sup>4</sup> C <sup>4</sup> C <sup>4</sup> from aliphatic |
|          | -5.0  | 2           | gamma -C                                                                                           |
|          | 0.3   | 1           | delta -C                                                                                           |
|          | 0.3   | 1           | delta -O                                                                                           |
|          | -10.7 |             | general corrections                                                                                |

**Figure S8.** calculated NMR spectra of model **M8**

ChemNMR <sup>1</sup>H Estimation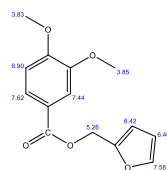

Estimation quality is indicated by color: **good**, **medium**, **rough**

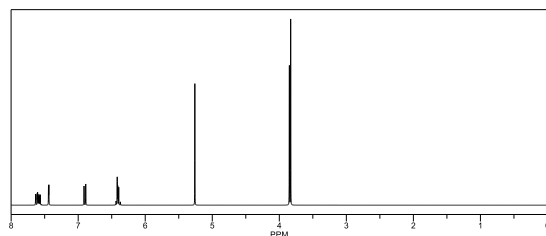

Protocol of the H-1 NMR Prediction (Lib=SU Solvent=DMSO 300 MHz):

| Node     | Shift | Base + Inc.                   | Comment (ppm rel. to TMS) |
|----------|-------|-------------------------------|---------------------------|
| CH 7.58  | 7.38  | 2-furan                       |                           |
|          | -0.08 | 1 -C-O                        |                           |
|          | 0.28  | general corrections           |                           |
| CH 6.42  | 6.30  | 2-furan                       |                           |
|          | -0.11 | 1 -C-O                        |                           |
|          | 0.23  | general corrections           |                           |
| CH 6.40  | 6.30  | 2-furan                       |                           |
|          | -0.05 | 1 -C-O                        |                           |
|          | 0.15  | general corrections           |                           |
| CH 7.44  | 7.26  | 1-benzene                     |                           |
|          | -0.38 | 1 -O-C                        |                           |
|          | 0.00  | 1 -O-C                        |                           |
|          | 0.71  | 1 -C(=O)OC                    |                           |
|          | -0.15 | general corrections           |                           |
| CH 6.90  | 7.26  | 1-benzene                     |                           |
|          | 0.00  | 1 -O-C                        |                           |
|          | -0.38 | 1 -O-C                        |                           |
|          | 0.11  | 1 -C(=O)OC                    |                           |
|          | -0.09 | general corrections           |                           |
| CH 7.62  | 7.26  | 1-benzene                     |                           |
|          | -0.32 | 1 -O-C                        |                           |
|          | 0.00  | 1 -O-C                        |                           |
|          | 0.71  | 1 -C(=O)OC                    |                           |
|          | -0.03 | general corrections           |                           |
| CH2 5.26 | 1.37  | methylene                     |                           |
|          | 1.07  | 1 alpha -1:C-O-C=C=1          |                           |
|          | 2.92  | 1 alpha -OC(=O)-1:C*C*C*C*C*1 |                           |
|          | 0.10  | general corrections           |                           |
| CH3 3.85 | 0.86  | methyl                        |                           |
|          | 2.87  | 1 alpha -O-1:C*C*C*C*C*1      |                           |
|          | 0.12  | general corrections           |                           |
| CH3 3.83 | 0.86  | methyl                        |                           |
|          | 2.87  | 1 alpha -O-1:C*C*C*C*C*1      |                           |
|          | 0.10  | general corrections           |                           |

## 1H NMR Coupling Constant Prediction

| shift | atom index | coupling partner, constant and vector |
|-------|------------|---------------------------------------|
| 7.58  | 16         | 17 7.5 H-C*C-H                        |
|       |            | 18 1.5 H-C*CH*C-H                     |
| 6.42  | 18         | 17 7.5 H-C*C-H                        |
|       |            | 16 1.5 H-C*CH*C-H                     |
| 6.40  | 17         | 16 7.5 H-C*C-H                        |
|       |            | 18 7.5 H-C*C-H                        |
| 7.44  | 5          | 3 1.5 H-C*C*C-H                       |
| 6.90  | 2          | 3 7.5 H-C*C-H                         |
| 7.62  | 3          | 2 7.5 H-C*C-H                         |
|       |            | 5 1.5 H-C*C*C-H                       |
| 5.26  | 13         |                                       |
| 3.85  | 10         |                                       |
| 3.83  | 19         |                                       |

ChemNMR <sup>13</sup>C Estimation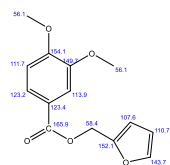

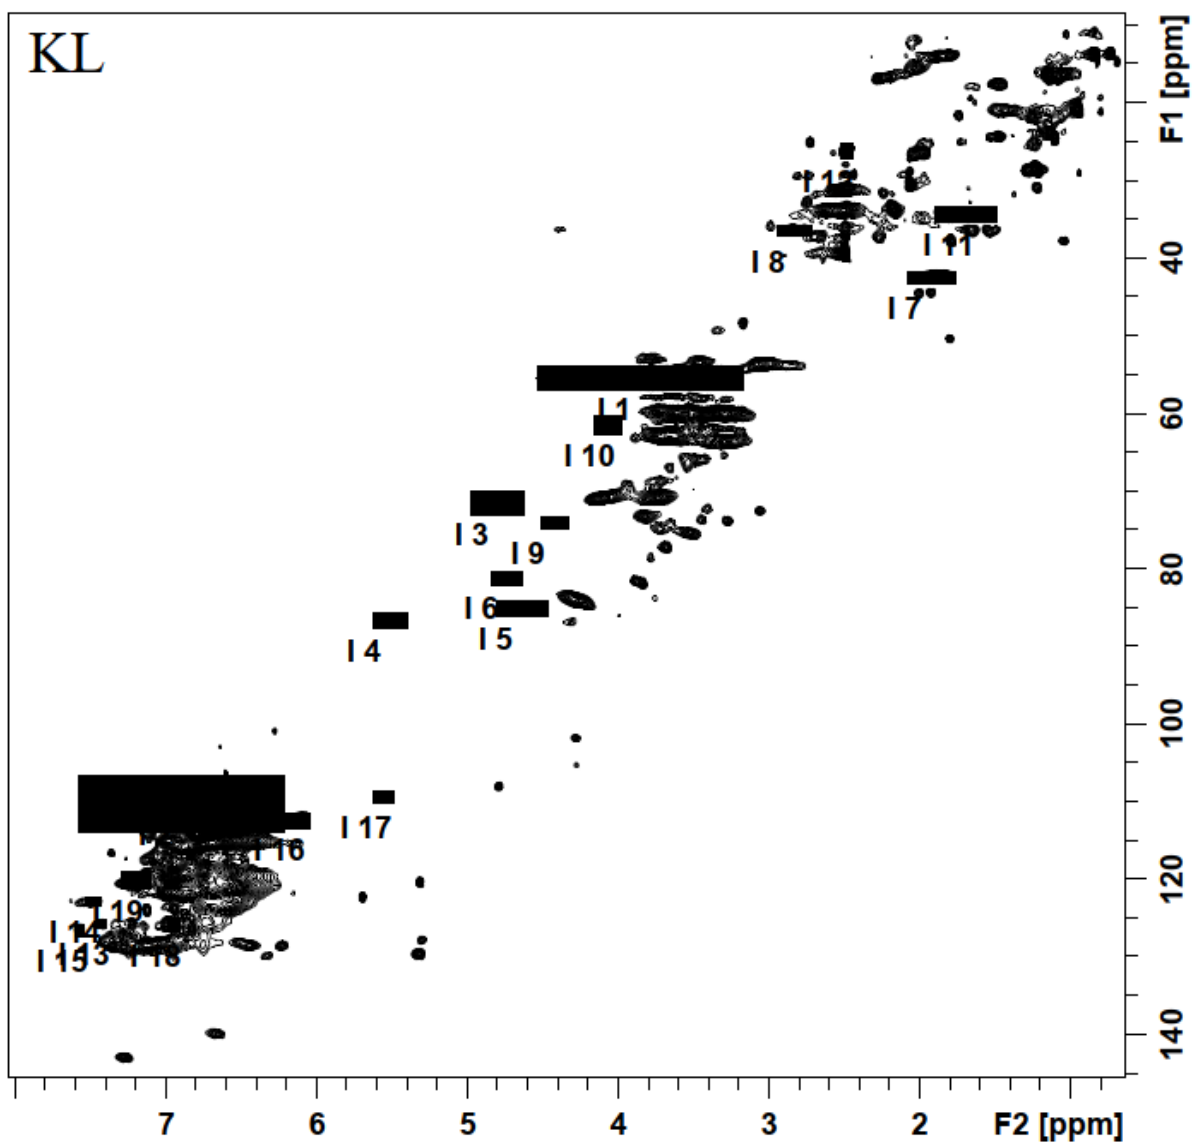

**Figure S10.** integral of typical structures in KL (nlev = 50, lev0 = 20, toplev = 100 %)

Detailed data set for Figure S10:

Name = KL    xzc12-4   ExpNo =   2   ProcNo =   1

Baseline = 0   Noise = 0

| #     | SI_F1 | row1 | row2      | row1(ppm) | row2(ppm) | abs. Int. | Integral | norm. Int. | Mode |
|-------|-------|------|-----------|-----------|-----------|-----------|----------|------------|------|
| SI_F2 | col1  | col2 | col1(ppm) | col2(ppm) |           |           |          |            |      |

|                      |      |     |     |          |          |            |            |            |          |
|----------------------|------|-----|-----|----------|----------|------------|------------|------------|----------|
| <b>Methoxyl (I1)</b> | 1024 | 739 | 754 | 56.87234 | 53.74060 | 7.4108e+13 | 7.0675e+07 | <b>300</b> | <b>a</b> |
|----------------------|------|-----|-----|----------|----------|------------|------------|------------|----------|

|  |      |     |     |         |         |  |  |  |  |
|--|------|-----|-----|---------|---------|--|--|--|--|
|  | 1024 | 578 | 706 | 4.53892 | 3.17355 |  |  |  |  |
|--|------|-----|-----|---------|---------|--|--|--|--|

|               |      |     |     |           |           |            |            |               |          |
|---------------|------|-----|-----|-----------|-----------|------------|------------|---------------|----------|
| <b>G2(I2)</b> | 1024 | 468 | 503 | 113.83346 | 106.57680 | 2.2984e+13 | 2.1919e+07 | <b>93.043</b> | <b>a</b> |
|---------------|------|-----|-----|-----------|-----------|------------|------------|---------------|----------|

|  |      |     |     |         |         |  |  |  |  |
|--|------|-----|-----|---------|---------|--|--|--|--|
|  | 1024 | 294 | 421 | 7.57623 | 6.21993 |  |  |  |  |
|--|------|-----|-----|---------|---------|--|--|--|--|

|               |      |     |     |          |          |            |            |               |          |
|---------------|------|-----|-----|----------|----------|------------|------------|---------------|----------|
| <b>Aa(I3)</b> | 1024 | 663 | 677 | 72.88113 | 70.01336 | 1.7135e+12 | 1.6341e+06 | <b>6.9364</b> | <b>a</b> |
|---------------|------|-----|-----|----------|----------|------------|------------|---------------|----------|

|  |      |     |     |         |         |  |  |  |  |
|--|------|-----|-----|---------|---------|--|--|--|--|
|  | 1024 | 537 | 570 | 4.98152 | 4.62657 |  |  |  |  |
|--|------|-----|-----|---------|---------|--|--|--|--|

|                                     |      |     |     |           |           |            |            |                  |
|-------------------------------------|------|-----|-----|-----------|-----------|------------|------------|------------------|
| <b>B<math>\alpha</math>(I4)</b>     | 1024 | 593 | 603 | 87.71448  | 85.63781  | 5.2104e+11 | 4.969e+05  | <b>2.1092 a</b>  |
|                                     | 1024 | 476 | 498 | 5.63634   | 5.39155   |            |            |                  |
| <b>C<math>\alpha</math>(I5)</b>     | 1024 | 601 | 610 | 86.03336  | 84.05559  | 8.9228e+11 | 8.5095e+05 | <b>3.6121 a</b>  |
|                                     | 1024 | 553 | 584 | 4.80405   | 4.47970   |            |            |                  |
| <b>C'<math>\alpha</math>(I6)</b>    | 1024 | 620 | 628 | 81.97892  | 80.19892  | 3.2991e+11 | 3.1463e+05 | <b>1.3355 a</b>  |
|                                     | 1024 | 550 | 569 | 4.84076   | 4.63881   |            |            |                  |
| <b>SR<math>\beta</math>(I7)</b>     | 1024 | 804 | 812 | 43.21573  | 41.53674  | 1.2648e+12 | 1.2062e+06 | <b>5.1202 a</b>  |
|                                     | 1024 | 807 | 837 | 2.08733   | 1.76134   |            |            |                  |
| <b>Ar<math>\alpha</math>(I8)</b>    | 1024 | 834 | 840 | 37.01077  | 35.76978  | 3.9495e+11 | 3.7666e+05 | <b>1.5988 a</b>  |
|                                     | 1024 | 727 | 748 | 2.94367   | 2.71499   |            |            |                  |
| <b>AG<math>\alpha</math>(I9)</b>    | 1024 | 654 | 662 | 74.79440  | 73.24104  | 2.9683e+11 | 2.8307e+05 | <b>1.2016 a</b>  |
|                                     | 1024 | 580 | 597 | 4.51274   | 4.33490   |            |            |                  |
| <b>D<math>\gamma</math>(I10)</b>    | 1024 | 712 | 723 | 62.53218  | 60.29508  | 7.1084e+11 | 6.7791e+05 | <b>2.8776 a</b>  |
|                                     | 1024 | 613 | 630 | 4.16823   | 3.97984   |            |            |                  |
| <b>DHCA<math>\beta</math>(I11)</b>  | 1024 | 842 | 852 | 35.36743  | 33.23687  | 2.0074e+12 | 1.9144e+06 | <b>8.1264 a</b>  |
|                                     | 1024 | 825 | 863 | 1.89965   | 1.48361   |            |            |                  |
| <b>AV<math>\beta</math>(I12)</b>    | 1024 | 881 | 890 | 27.05822  | 25.14071  | 2.3597e+11 | 2.2504e+05 | <b>0.95525 a</b> |
|                                     | 1024 | 766 | 773 | 2.52763   | 2.44913   |            |            |                  |
| <b>V6(I13)</b>                      | 1024 | 408 | 416 | 126.53445 | 124.84582 | 2.1618e+11 | 2.0616e+05 | <b>0.87512 a</b> |
|                                     | 1024 | 302 | 313 | 7.49588   | 7.37565   |            |            |                  |
| <b>VA6(I14)</b>                     | 1024 | 423 | 428 | 123.44588 | 122.30872 | 1.6251e+11 | 1.5498e+05 | <b>0.65786 a</b> |
|                                     | 1024 | 298 | 307 | 7.53416   | 7.43899   |            |            |                  |
| <b>Bi6(I16)</b>                     | 1024 | 405 | 411 | 127.04691 | 125.78339 | 1.6579e+11 | 1.5811e+05 | <b>0.67115 a</b> |
|                                     | 1024 | 292 | 297 | 7.60157   | 7.55002   |            |            |                  |
| <b>E-EE<math>\alpha</math>(I17)</b> | 1024 | 471 | 480 | 113.33772 | 111.31609 | 5.9059e+11 | 5.6323e+05 | <b>2.3908 a</b>  |
|                                     | 1024 | 421 | 437 | 6.21767   | 6.05112   |            |            |                  |
| <b>Z-EE<math>\alpha</math>(I18)</b> | 1024 | 486 | 493 | 110.05257 | 108.59953 | 2.5104e+11 | 2.3941e+05 | <b>1.0162 a</b>  |
|                                     | 1024 | 477 | 489 | 5.61890   | 5.49201   |            |            |                  |
| <b>SB1<math>\alpha</math>(I19)</b>  | 1024 | 407 | 416 | 126.73103 | 124.83575 | 7.7581e+11 | 7.3987e+05 | <b>3.1406 a</b>  |
|                                     | 1024 | 349 | 356 | 6.99091   | 6.91557   |            |            |                  |
| <b>SB5<math>\beta</math>(I20)</b>   | 1024 | 433 | 444 | 121.17155 | 118.96039 | 1.3081e+12 | 1.2475e+06 | <b>5.2952 a</b>  |
|                                     | 1024 | 320 | 338 | 7.30020   | 7.10987   |            |            |                  |



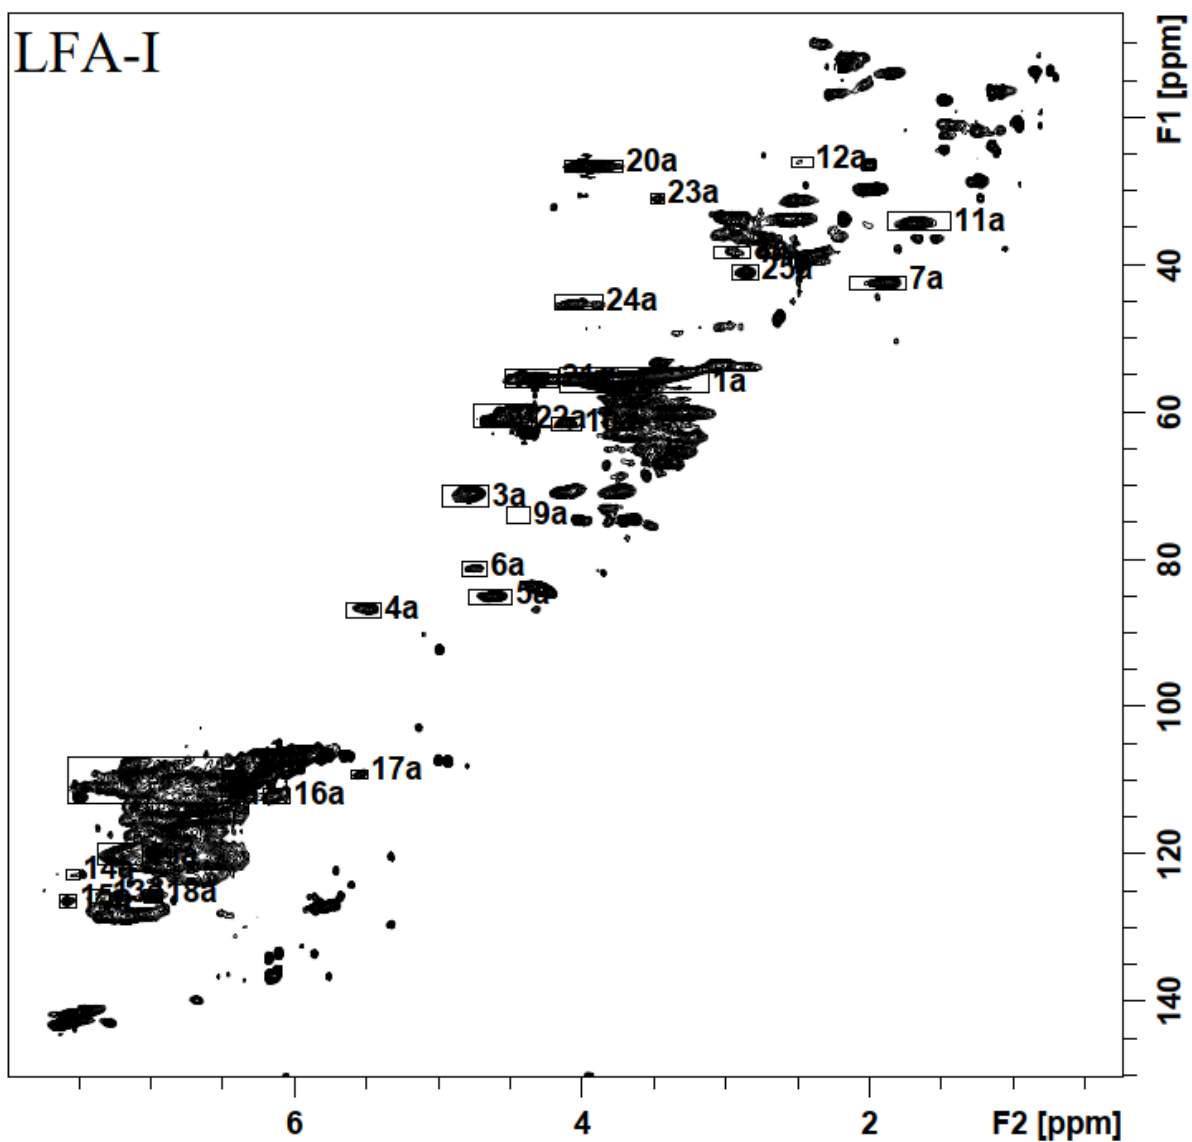

**Figure S11.** integral of typical aromatic units in LFA-I (nlev = 50, lev0 = 20, toplev = 100 %)

Detailed data set for Figure S11:

Name = LFA-I xzc33-S ExpNo = 2 ProcNo = 1

Baseline = 0 Noise = 0

| # | SI_F1 | row1 | row2 | row1(ppm) | row2(ppm) | abs. Int. | Integral | norm. Int. | Mode |
|---|-------|------|------|-----------|-----------|-----------|----------|------------|------|
|   | SI_F2 | col1 | col2 | col1(ppm) | col2(ppm) |           |          |            |      |

|                     |      |     |     |          |          |            |            |     |   |
|---------------------|------|-----|-----|----------|----------|------------|------------|-----|---|
| <b>Methoxyl(I1)</b> | 1024 | 738 | 753 | 57.07990 | 54.00709 | 5.9417e+13 | 5.6665e+07 | 300 | a |
|---------------------|------|-----|-----|----------|----------|------------|------------|-----|---|

|  |      |     |     |         |         |  |  |  |  |
|--|------|-----|-----|---------|---------|--|--|--|--|
|  | 1024 | 614 | 710 | 4.15006 | 3.12031 |  |  |  |  |
|--|------|-----|-----|---------|---------|--|--|--|--|

|               |      |     |     |           |           |            |            |       |   |
|---------------|------|-----|-----|-----------|-----------|------------|------------|-------|---|
| <b>G2(I2)</b> | 1024 | 472 | 501 | 113.11025 | 106.89172 | 1.8077e+13 | 1.7239e+07 | 91.27 | a |
|---------------|------|-----|-----|-----------|-----------|------------|------------|-------|---|

|  |      |     |     |         |         |  |  |  |  |
|--|------|-----|-----|---------|---------|--|--|--|--|
|  | 1024 | 294 | 393 | 7.57550 | 6.51197 |  |  |  |  |
|--|------|-----|-----|---------|---------|--|--|--|--|

|                                     |      |     |     |           |           |            |            |                  |
|-------------------------------------|------|-----|-----|-----------|-----------|------------|------------|------------------|
| <b>A<math>\alpha</math>(I3)</b>     | 1024 | 664 | 677 | 72.67445  | 70.06174  | 1.2703e+12 | 1.2115e+06 | <b>6.414 a</b>   |
|                                     | 1024 | 537 | 567 | 4.96677   | 4.65019   |            |            |                  |
| <b>B<math>\alpha</math>(I4)</b>     | 1024 | 592 | 601 | 87.80064  | 85.94424  | 4.7693e+11 | 4.5483e+05 | <b>2.408 a</b>   |
|                                     | 1024 | 475 | 497 | 5.63108   | 5.39754   |            |            |                  |
| <b>C<math>\alpha</math>(I5)</b>     | 1024 | 601 | 609 | 85.94424  | 84.22535  | 7.5991e+11 | 7.2471e+05 | <b>3.8368 a</b>  |
|                                     | 1024 | 555 | 582 | 4.77474   | 4.49449   |            |            |                  |
| <b>C'<math>\alpha</math>(I6)</b>    | 1024 | 619 | 627 | 82.09393  | 80.51256  | 2.6982e+11 | 2.5732e+05 | <b>1.3624 a</b>  |
|                                     | 1024 | 550 | 566 | 4.83183   | 4.66576   |            |            |                  |
| <b>SR<math>\beta</math>(I7)</b>     | 1024 | 804 | 812 | 43.29043  | 41.63521  | 9.814e+11  | 9.3594e+05 | <b>4.9551 a</b>  |
|                                     | 1024 | 802 | 838 | 2.13209   | 1.75063   |            |            |                  |
| <b>A<math>\alpha</math>(I8)</b>     | 1024 | 824 | 831 | 39.02505  | 37.68814  | 3.7038e+11 | 3.5322e+05 | <b>1.87 a</b>    |
|                                     | 1024 | 714 | 737 | 3.07212   | 2.83371   |            |            |                  |
| <b>AG<math>\alpha</math>(I9)</b>    | 1024 | 653 | 663 | 75.12163  | 73.01823  | 2.1066e+11 | 2.009e+05  | <b>1.0636 a</b>  |
|                                     | 1024 | 579 | 594 | 4.51650   | 4.36076   |            |            |                  |
| <b>D<math>\gamma</math>(II0)</b>    | 1024 | 713 | 721 | 62.42607  | 60.77340  | 4.6521e+11 | 4.4366e+05 | <b>2.3489 a</b>  |
|                                     | 1024 | 609 | 627 | 4.19903   | 4.00735   |            |            |                  |
| <b>DHCA<math>\beta</math>(II1)</b>  | 1024 | 842 | 854 | 35.33900  | 32.87951  | 1.6852e+12 | 1.6071e+06 | <b>8.5086 a</b>  |
|                                     | 1024 | 821 | 867 | 1.92651   | 1.43658   |            |            |                  |
| <b>AV<math>\beta</math>(II2)</b>    | 1024 | 883 | 889 | 26.74288  | 25.40851  | 1.2242e+11 | 1.1675e+05 | <b>0.6181 a</b>  |
|                                     | 1024 | 765 | 777 | 2.53260   | 2.40511   |            |            |                  |
| <b>V6(II3)</b>                      | 1024 | 409 | 415 | 126.34295 | 125.13434 | 1.8565e+11 | 1.7705e+05 | <b>0.93733 a</b> |
|                                     | 1024 | 309 | 320 | 7.41127   | 7.29067   |            |            |                  |
| <b>VA6(II4)</b>                     | 1024 | 423 | 428 | 123.42866 | 122.40794 | 9.5628e+10 | 91198      | <b>0.48283 a</b> |
|                                     | 1024 | 293 | 301 | 7.58153   | 7.49676   |            |            |                  |
| <b>Bi6(II5)</b>                     | 1024 | 405 | 412 | 127.11896 | 125.62713 | 1.9833e+11 | 1.8914e+05 | <b>1.0014 a</b>  |
|                                     | 1024 | 289 | 299 | 7.62921   | 7.51795   |            |            |                  |
| <b>E-EE<math>\alpha</math>(II6)</b> | 1024 | 472 | 481 | 113.06442 | 111.18002 | 6.0827e+11 | 5.8009e+05 | <b>3.0712 a</b>  |
|                                     | 1024 | 421 | 438 | 6.21463   | 6.02920   |            |            |                  |
| <b>Z-EE<math>\alpha</math>(II7)</b> | 1024 | 488 | 493 | 109.76671 | 108.58895 | 1.5602e+11 | 1.4879e+05 | <b>0.78776 a</b> |
|                                     | 1024 | 478 | 488 | 5.60535   | 5.49939   |            |            |                  |
| <b>SB1<math>\alpha</math>(II8)</b>  | 1024 | 408 | 416 | 126.49082 | 124.92048 | 5.5834e+11 | 5.3247e+05 | <b>2.8191 a</b>  |
|                                     | 1024 | 344 | 355 | 7.03583   | 6.91927   |            |            |                  |

**SB5 $\beta$ (I19)** 1024 433 445 121.18516 118.70278 1.2164e+12 1.1601e+06 **6.1417 a**  
1024 305 332 7.45604 7.16186

**CH2 in pFA(I20)** 1024 880 887 27.37992 25.91314 1.4712e+13 1.403e+07 **74.28 a**  
1024 617 654 4.11856 3.72374

**CH2OH in pFA(I21)** 1024 741 752 56.59333 54.14869 8.2265e+12 7.8454e+06 **41.536 a**  
1024 578 612 4.52887 4.17275

**CH2OCH2 in pFA(I22)** 1024 715 729 61.97152 59.16019 4.1691e+12 3.9759e+06 **21.05 a**  
1024 558 595 4.74564 4.35081

**New peak 2(I23)** 1024 860 865 31.53580 30.43572 1.1151e+11 1.0635e+05 **0.56303 a**  
1024 673 681 3.51471 3.42955

**New peak 3(I24)** 1024 791 800 45.95916 44.24791 5.7779e+11 5.5102e+05 **2.9173 a**  
1024 611 641 4.18050 3.85535

**New peak 4(I25)** 1024 811 819 41.92551 40.09203 4.84e+11 4.6157e+05 **2.4437 a**  
1024 726 742 2.94957 2.77926

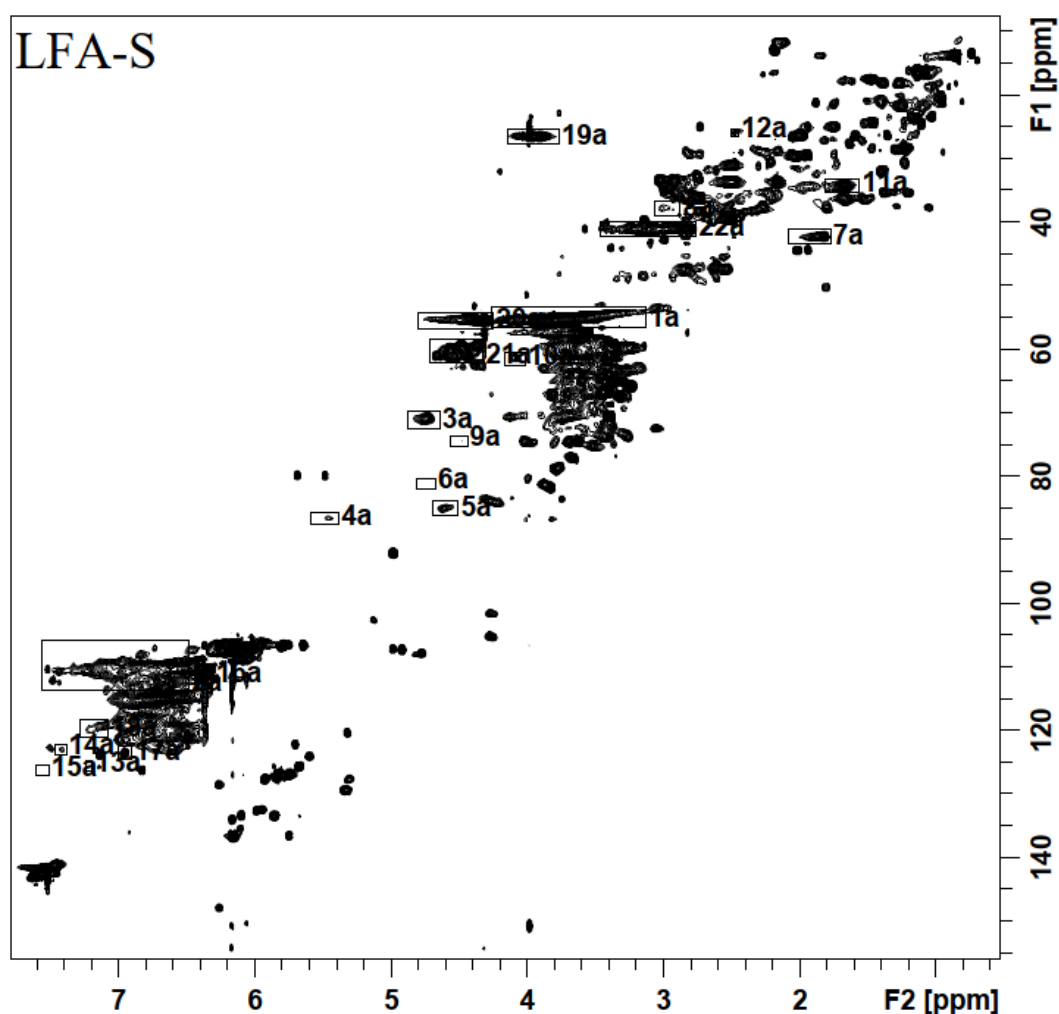

**Figure S12.** integral of typical aromatic units in LFA-S (nlev = 50, lev0 = 20, toplev = 100 %)

Detailed data set for Figure S12:

Name = LFA-S      xzc33-L   ExpNo =   2   ProcNo =   1

Baseline = 0   Noise = 0

| #                   | SI_F1 | row1 | row2      | row1(ppm) | row2(ppm) | abs. Int.  | Integral   | norm. Int. | Mode |
|---------------------|-------|------|-----------|-----------|-----------|------------|------------|------------|------|
| SI_F2               | col1  | col2 | col1(ppm) | col2(ppm) |           |            |            |            |      |
| <b>Methoxyl(I1)</b> | 1024  | 741  | 755       | 56.33739  | 53.46749  | 3.4298e+13 | 3.271e+07  | 300        | a    |
|                     | 1024  | 604  | 709       | 4.24803   | 3.12895   |            |            |            |      |
| <b>G2(I2)</b>       | 1024  | 472  | 497       | 112.91586 | 107.64885 | 1.0506e+13 | 1.0019e+07 | 91.892     | a    |
|                     | 1024  | 296  | 384       | 7.54531   | 6.60333   |            |            |            |      |
| <b>Aα(I3)</b>       | 1024  | 665  | 677       | 72.34975  | 69.77652  | 6.9156e+11 | 6.5953e+05 | 6.0489     | a    |
|                     | 1024  | 546  | 567       | 4.87054   | 4.64776   |            |            |            |      |
| <b>Bα(I4)</b>       | 1024  | 592  | 601       | 87.63552  | 85.69382  | 2.2353e+11 | 2.1317e+05 | 1.9551     | a    |
|                     | 1024  | 477  | 499       | 5.61500   | 5.37349   |            |            |            |      |
| <b>Cα(I5)</b>       | 1024  | 600  | 611       | 86.08216  | 83.62267  | 4.1166e+11 | 3.9259e+05 | 3.6007     | a    |
|                     | 1024  | 553  | 583       | 4.79992   | 4.47539   |            |            |            |      |
| <b>C'α(I6)</b>      | 1024  | 618  | 626       | 82.14528  | 80.59537  | 1.487e+11  | 1.4181e+05 | 1.3006     | a    |
|                     | 1024  | 552  | 568       | 4.80493   | 4.63447   |            |            |            |      |
| <b>SRβ(I7)</b>      | 1024  | 804  | 814       | 43.11005  | 41.08134  | 7.1584e+11 | 6.8268e+05 | 6.2613     | a    |
|                     | 1024  | 816  | 834       | 1.98494   | 1.78934   |            |            |            |      |
| <b>Ara(I8)</b>      | 1024  | 825  | 832       | 38.70461  | 37.15125  | 2.5115e+11 | 2.3951e+05 | 2.1967     | a    |
|                     | 1024  | 716  | 729       | 3.04900   | 2.91316   |            |            |            |      |
| <b>AGα(I9)</b>      | 1024  | 652  | 658       | 75.17170  | 73.89760  | 1.0919e+11 | 1.0413e+05 | 0.95505    | a    |
|                     | 1024  | 575  | 586       | 4.55936   | 4.43995   |            |            |            |      |
| <b>Dγ(I10)</b>      | 1024  | 712  | 721       | 62.36367  | 60.55312  | 2.6153e+11 | 2.4941e+05 | 2.2875     | a    |
|                     | 1024  | 613  | 626       | 4.15770   | 4.02201   |            |            |            |      |
| <b>DHCAβ(I11)</b>   | 1024  | 843  | 850       | 34.99521  | 33.37225  | 9.0064e+11 | 8.5892e+05 | 7.8777     | a    |
|                     | 1024  | 834  | 854       | 1.78934   | 1.57925   |            |            |            |      |
| <b>AVβ(I12)</b>     | 1024  | 885  | 890       | 26.14826  | 25.11269  | 6.6369e+10 | 63295      | 0.58051    | a    |
|                     | 1024  | 771  | 776       | 2.46033   | 2.41505   |            |            |            |      |

**V6(I13)** 1024 408 415 126.43388 124.90428 1.0777e+11 1.0277e+05 **0.9426 a**  
 1024 322 330 7.27053 7.18673

**VA6(I14)** 1024 422 427 123.45518 122.28786 8.1289e+10 77524 **0.71102 a**  
 1024 305 311 7.45824 7.38785

**Bi6(I15)** 1024 405 412 126.89611 125.41914 9.0653e+10 86453 **0.79292 a**  
 1024 291 299 7.59788 7.51748

**E-EE $\alpha$ (I16)** 1024 475 479 112.34071 111.42860 3.8079e+11 3.6315e+05 **3.3307 a**  
 1024 400 413 6.43551 6.29877

**SB1 $\alpha$ (I17)** 1024 417 427 124.42645 122.44919 3.2148e+11 3.0659e+05 **2.8119 a**  
 1024 345 356 7.01968 6.91093

**SB5 $\beta$ (I18)** 1024 430 444 121.77834 118.70651 6.6448e+11 6.337e+05 **5.8121 a**  
 1024 320 341 7.29651 7.06912

**CH2 in pFA(I19)** 1024 878 888 27.48687 25.41445 1.7224e+13 1.6426e+07 **150.66 a**  
 1024 615 649 4.13779 3.76692

**CH2OH in pFA(I20)** 1024 740 751 56.50079 54.21022 2.1092e+13 2.0115e+07 **184.49 a**  
 1024 553 604 4.80005 4.25434

**CH2OCH2 in pFA(I21)** 1024 714 731 62.06361 58.57322 5.8616e+12 5.5901e+06 **51.27 a**  
 1024 561 597 4.70998 4.32852

**New peak 7(I22)** 1024 809 819 41.99383 40.03048 1.1442e+13 1.0912e+07 **100.08 a**  
 1024 678 743 3.45964 2.76029
